# Supplementary material
Source: PubMed Central journal article supplement (PMC7307915)
Supplement: jp9b10880_si_001.pdf [file jp9b10880_si_001.pdf]

# Supporting Information

## Performance of Electronic Structure Methods for the Description of Hückel-Möbius Interconversions in Extended $\pi$ -Systems

*Tatiana Woller,<sup>†,‡</sup> Ambar Banerjee,<sup>§</sup> Nitai Sylvetsky,<sup>§</sup> Golokesh Santra,<sup>§</sup> Xavier Deraet,<sup>†</sup>  
Frank De Proft,<sup>†</sup> Jan M. L. Martin,<sup>\*,§</sup> and Mercedes Alonso<sup>\*,†</sup>*

<sup>†</sup>Department of General Chemistry (ALGC), Faculty of Science and Bio-engineering Sciences,  
Vrije Universiteit Brussel (VUB), Pleinlaan 2, 1050 Brussels, Belgium

<sup>‡</sup> Laboratoire de Chimie Théorique (LCT), Sorbonne Université, CNRS, F-75005 Paris

<sup>§</sup> Department of Organic Chemistry, Weizmann Institute of Science, 76100 Rehovot, Israel

|                                                                                                                                               |     |
|-----------------------------------------------------------------------------------------------------------------------------------------------|-----|
| <b>I.</b> Performance of M06-2X to describe the geometry and relative stability of twisted Hückel topologies as compared to experimental data | S2  |
| <b>II.</b> Influence of the basis set on the MP2 and DFT relative energies                                                                    | S3  |
| <b>III.</b> The database of Hückel and Möbius expanded porphyrins                                                                             | S5  |
| <b>IV.</b> Diagnostic criteria to assess the suitability of single-reference methods                                                          | S6  |
| <b>V.</b> Comparison between limited orbital space full CI and CCSD(T) calculations                                                           | S8  |
| <b>VI.</b> Performance of lower-level wavefunction methods                                                                                    | S10 |
| <b>VII.</b> Performance of DFT methods                                                                                                        | S15 |
| <b>VIII.</b> Cartesian coordinates of B3LYP/6-311G(d,p) optimized geometries                                                                  | S26 |

## I. Performance of M06-2X to describe the geometry and relative stability of twisted Hückel topologies as compared to experimental data

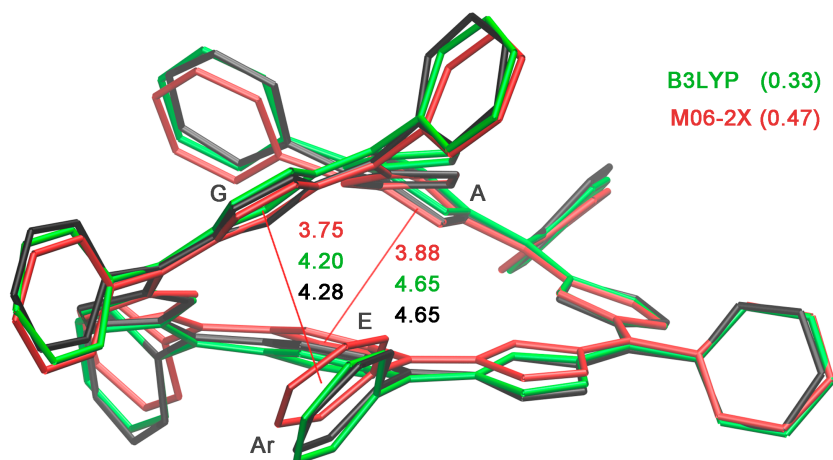

**Figure S1.** Comparison of B3LYP and M06-2X optimized geometries of the figure-eight conformation of neutral *meso*-C<sub>6</sub>F<sub>5</sub>-substituted [32]heptaphyrin, overlaid with the X-ray structure. The centroid-centroid distance (in Å) and the RMSDs (in parenthesis) are also shown.

**Table S1.** Geometrical descriptors of the  $\pi$ - $\pi$  stacking interactions of the figure-eight conformation of *meso*-C<sub>6</sub>F<sub>5</sub>-substituted [32]heptaphyrin. Relative energies (in kcal mol<sup>-1</sup>) of the figure-eight and Möbius conformers in neutral and monoprotonated states.

|        | Angle <sub>A-E</sub> | <i>R</i> <sub>c-c</sub> | <i>R</i> <sub>c-plane</sub> | Angle <sub>G-Ar</sub> | <i>R</i> <sub>c-c</sub> | <i>R</i> <sub>c-plane</sub> |  | 32F  | 32M   | [32F] <sup>+</sup> | [32M] <sup>+</sup> |
|--------|----------------------|-------------------------|-----------------------------|-----------------------|-------------------------|-----------------------------|--|------|-------|--------------------|--------------------|
| RX     | 25.7                 | 4.65                    | 3.68                        | 17.3                  | 4.28                    | 3.86                        |  | x    |       |                    | x                  |
| B3LYP  | 16.7                 | 4.65                    | 3.68                        | 22.6                  | 4.50                    | 4.18                        |  | 0.00 | 5.24  | 2.83               | 0.00               |
| M06-2x | 15.0                 | 3.88                    | 3.15                        | 13.5                  | 3.75                    | 3.49                        |  | 0.00 | 16.15 | 0.00               | 6.00               |

<sup>a</sup>  $\pi$ - $\pi$  stacking interactions between pyrrole rings A and E and pyrrole ring G and a pentafluorophenyl substituent.

## II. Influence of the basis set on the MP2 and DFT relative energies

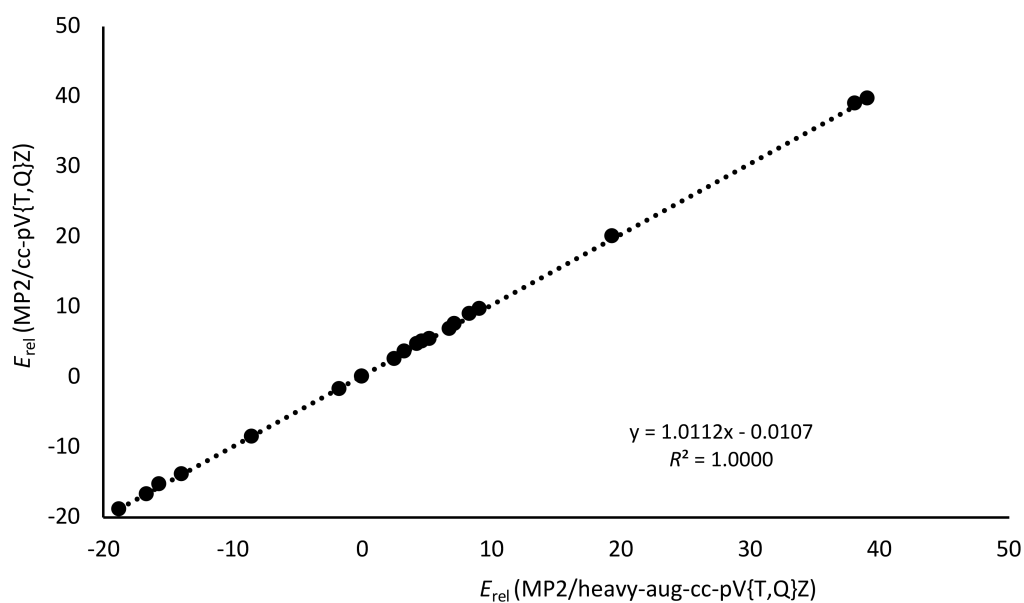

**Figure S2.** Influence of diffuse functions on the extrapolated MP2 relative energies to the complete basis set limit of our test set. Linear correlation between the extrapolated cc-pV{T,Q}Z and heavy-aug-cc-pV{T,Q}Z relative energies for the 21 porphyrinoid structures.

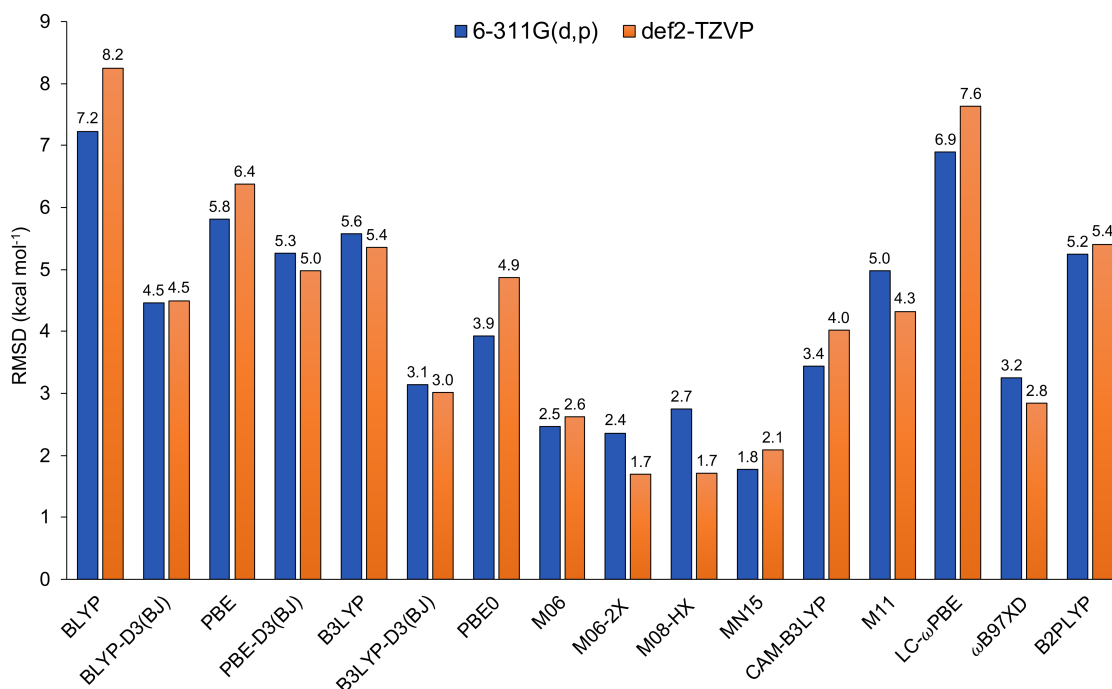

**Figure S3.** Basis set dependence: root-mean-square deviations (RMSDs in kcal mol<sup>-1</sup>) for several exchange-correlation functionals over the relative energies of the expanded porphyrin database, relative to canonical CCSD(T)/CBS reference values. For each functional, the statistical errors obtained with the Pople 6-311G(d,p) basis set and the Weigend-Ahlrichs def2-TZVP basis set are shown.

**Table S2.** Relative energies (in kcal mol<sup>-1</sup>) for the different minima and TSs involved in the topology interconversion of [32]heptaphyrin computed with B3LYP and B3LYP-D3 together with the reference CCSD(T)/CBS energies.

| Basis set | M06-2X | M06-2X-D3(0) | B3LYP-D3(BJ) | BLYP-D3(BJ) |
|-----------|--------|--------------|--------------|-------------|
| def2-TZVP | 1.69   | 1.51         | 3.03         | 4.49        |
| def2-QZVP | 1.65   | 1.53         | 2.82         | 4.22        |

### III. The database of Hückel and Möbius expanded porphyrins

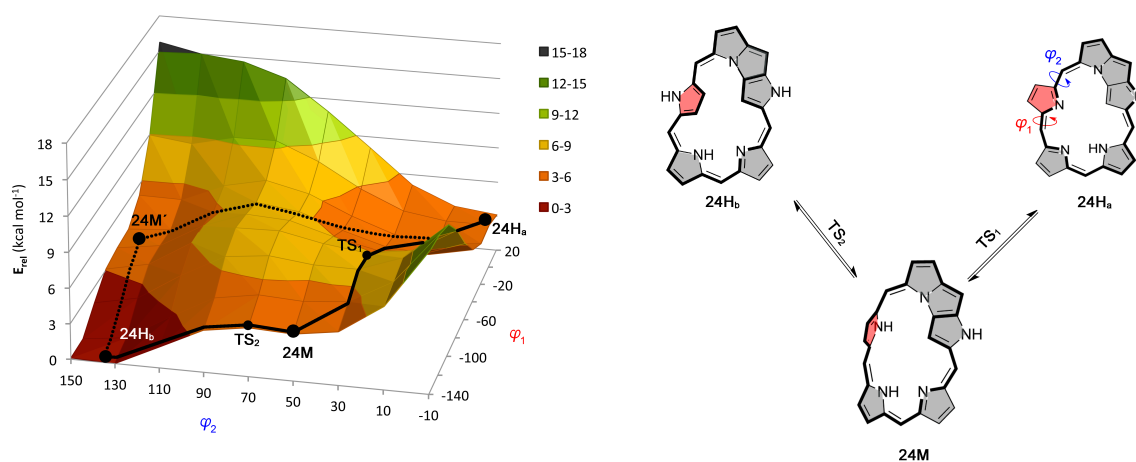

**Figure S4.** B3LYP/6-31G(d,p) relaxed energy potential surface computed for the Hückel-Möbius interconversions in *N*-fused [24]pentaphyrin together with the schematic geometries of the different minima.

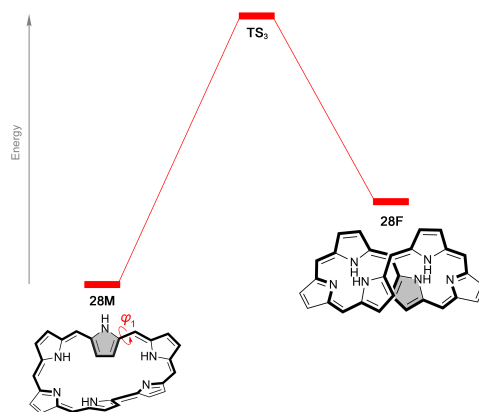

**Figure S5.** Schematic energetic profile for the Möbius/twisted-Hückel topology interconversion in [28]hexaphyrin.

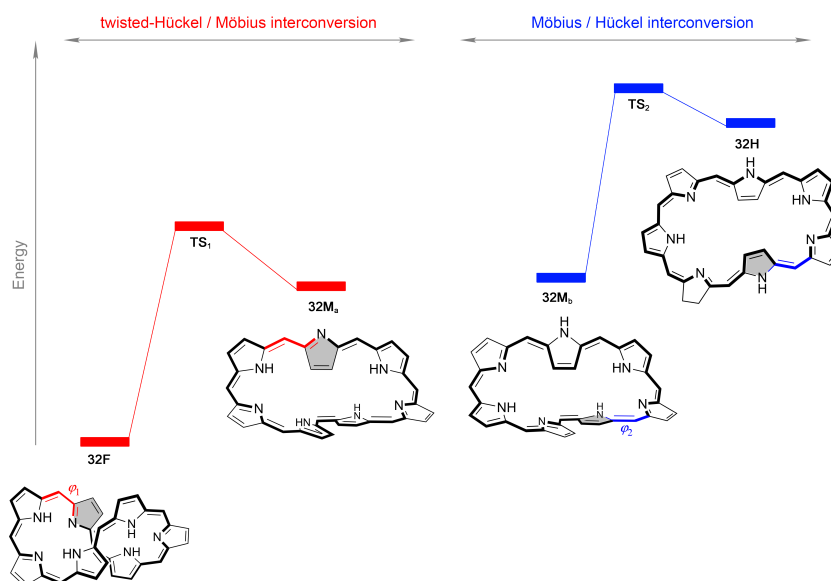

**Figure S6.** Schematic energetic profile for the three-level topology switching in [32]heptaphyrin, triggered by the rotation of the dihedral angles  $\varphi_1$  and  $\varphi_2$ .

#### IV. Diagnostic criteria to assess the suitability of single-reference methods

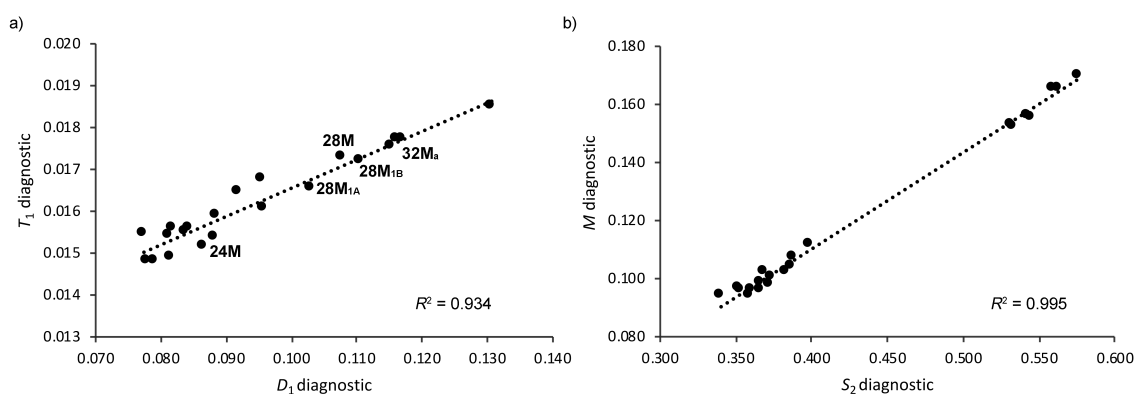

**Figure S7.** Relationship between several diagnostics for static correlation for our set of 21 expanded porphyrins: a)  $T_1$  vs  $D_1$  diagnostics and b)  $M$  vs  $S_2$ . Figure 2b shows that the structures are clustered in two groups as a function of the degree of static correlation. The Möbius structures of [26]hexaphyrin and [32]heptaphyrin exhibit the largest values for the  $M$  and  $S_2$  diagnostics.

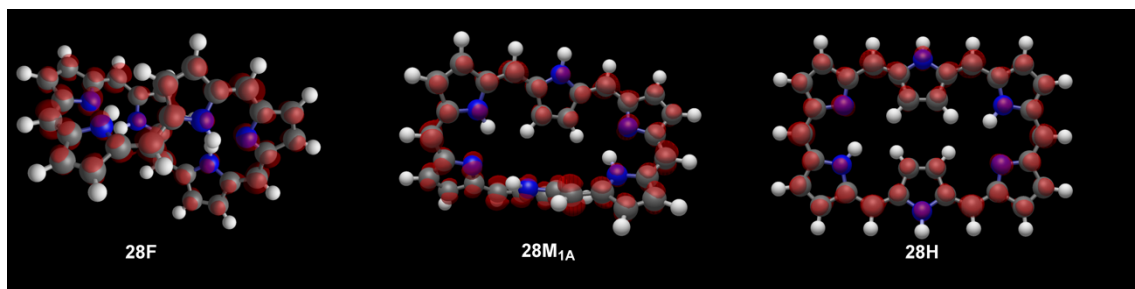

**Figure S8.** FOD plots at  $\sigma=0.005$  e Bohr<sup>-3</sup> [M06-2X/def2-TZVP (T=5000 K) level] for the twisted-Hückel, Möbius and Hückel topologies of [28]hexaphyrin.

## V. Comparison between limited orbital space full CI and CCSD(T) calculations

**Table S3.** Relative energies for Hückel-Möbius interconversions in expanded porphyrins computed with ICE-CI and CCSD(T) methods for different orbital active spaces (in kcal mol<sup>-1</sup>).

| system                    | CCSD(T)             | ICE-CI         | CCSD(T)        | ICE-CI         | CCSD(T)        | ICE-CI         | CCSD(T)        | ICE-CI         | CCSD(T)        |
|---------------------------|---------------------|----------------|----------------|----------------|----------------|----------------|----------------|----------------|----------------|
| active space              | <i>all orbitals</i> | <i>(12,12)</i> | <i>(12,12)</i> | <i>(18,18)</i> | <i>(18,18)</i> | <i>(24,24)</i> | <i>(24,24)</i> | <i>(30,30)</i> | <i>(30,30)</i> |
| <b>24H<sub>a</sub></b>    | 9.12                | 6.79           | 6.82           | -0.53          | -0.49          | 4.84           | 4.84           | 4.49           | 4.36           |
| <b>24H<sub>b</sub></b>    | 0.00                | 0.00           | 0.00           | 0.00           | 0.00           | 0.00           | 0.00           | 0.00           | 0.00           |
| <b>24M</b>                | 6.06                | 8.12           | 8.24           | 4.89           | 4.96           | 7.90           | 7.92           | 8.40           | 8.31           |
| <b>24TS<sub>1</sub></b>   | 9.05                | 6.70           | 6.71           | 3.29           | 3.28           | 6.68           | 6.62           | 6.53           | 6.38           |
| <b>24TS<sub>2</sub></b>   | 4.87                | 6.00           | 6.04           | 3.08           | 3.09           | 5.86           | 5.83           | 6.39           | 6.27           |
| <b>28H</b>                | 0.00                | 0.00           | 0.00           | 0.00           | 0.00           | 0.00           | 0.00           | 0.00           | 0.00           |
| <b>28M</b>                | -0.73               | 10.88          | 11.12          | 8.91           | 9.09           | 9.28           | 9.43           | 7.62           | 7.56           |
| <b>28M<sub>1A</sub></b>   | 0.46                | 12.60          | 12.87          | 9.91           | 10.12          | 10.39          | 10.54          | 8.55           | 8.48           |
| <b>28M<sub>1B</sub></b>   | 1.82                | 13.57          | 13.82          | 11.67          | 11.86          | 10.98          | 11.09          | 11.38          | 11.34          |
| <b>28F</b>                | -0.38               | 7.41           | 7.38           | 9.18           | 9.12           | 5.40           | 5.28           | 4.70           | 4.45           |
| <b>28TS<sub>1A</sub></b>  | 6.33                | 13.75          | 13.77          | 12.24          | 12.16          | 10.82          | 10.66          | 14.06          | 13.92          |
| <b>28TS<sub>1B</sub></b>  | 2.86                | 9.14           | 9.12           | 10.02          | 9.97           | 8.72           | 8.60           | 6.56           | 6.16           |
| <b>28TS<sub>2A</sub></b>  | 6.87                | 26.41          | 26.68          | 28.09          | 28.31          | 24.60          | 24.74          | 22.21          | 22.05          |
| <b>28TS<sub>2B</sub></b>  | 9.89                | 30.33          | 30.57          | 31.42          | 31.62          | 28.31          | 28.44          | 26.44          | 26.30          |
| <b>28TS<sub>3</sub></b>   | 5.17                | 15.03          | 15.02          | 14.55          | 14.44          | 13.31          | 13.15          | 12.17          | 11.84          |
| <b>32F</b>                | 0.00                | 0.00           | 0.00           | 0.00           | 0.00           | 0.00           | 0.00           | 0.00           | 0.00           |
| <b>32M<sub>a</sub></b>    | 16.81               | 18.35          | 18.63          | 10.75          | 10.99          | 13.47          | 13.71          | 12.55          | 12.62          |
| <b>32M<sub>b</sub></b>    | 16.74               | 18.46          | 18.72          | 13.85          | 14.15          | 15.71          | 16.03          | 17.48          | 17.98          |
| <b>32H</b>                | 34.60               | 22.91          | 22.90          | 24.75          | 24.74          | 24.18          | 24.17          | 27.23          | 27.49          |
| <b>32TS<sub>1</sub></b>   | 17.49               | 16.64          | 16.64          | 10.69          | 10.67          | 11.23          | 11.22          | 14.13          | 14.39          |
| <b>32TS<sub>2</sub></b>   | 33.79               | 24.28          | 24.22          | 24.71          | 24.65          | 25.40          | 25.37          | 27.58          | 27.74          |
| <b>RMSD<sup>[a]</sup></b> | -                   | 0.15           |                | 0.14           |                | 0.13           |                | 0.21           |                |
| <b>MUE<sup>[a]</sup></b>  | -                   | 0.10           |                | 0.10           |                | 0.09           |                | 0.16           |                |

<sup>[a]</sup> RMSD and MUE (in kcal mol<sup>-1</sup>) for the relative energies computed with ICE-CI and CCSD(T) methods for different orbital active spaces.



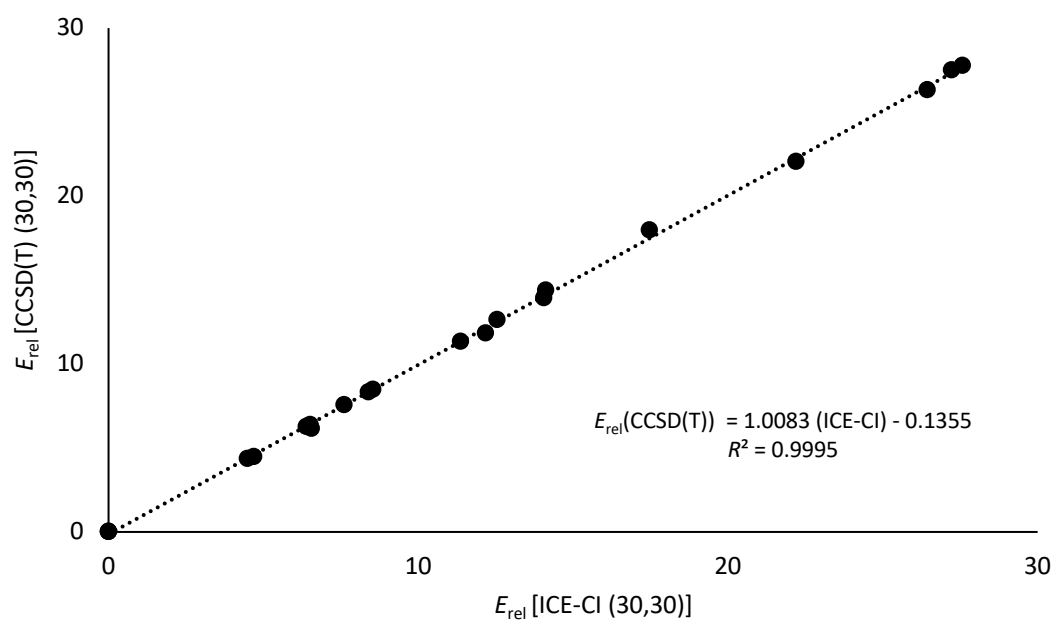

**Figure S9.** Reliability of the canonical CCSD(T) method for describing the relative energies of topology interconversions in expanded porphyrins. Linear correlation between the relative energies computed with CCSD(T) and the ICE-CI methods for an orbital active space (30,30).

## VI. Performance of lower-level wavefunction methods

**Table S4.** Relative energies for the different minima and TSs involved in the topology interconversions of several expanded porphyrins computed with several coupled cluster approaches. The statistical errors (in kcal mol<sup>-1</sup>) are computed with respect to canonical CCSD(T)/cc-pVDZ data.<sup>[a]</sup>

| system                   | CCSD(T) | CCSD  | SCS-CCSD | SCS(MI)-CCSD | DCSD  | SCS-DCSD         |
|--------------------------|---------|-------|----------|--------------|-------|------------------|
| <b>24H<sub>a</sub></b>   | 9.12    | 9.23  | 9.95     | 9.54         | 9.32  | 9.45             |
| <b>24H<sub>b</sub></b>   | 0.00    | 0.00  | 0.00     | 0.00         | 0.00  | 0.00             |
| <b>24M</b>               | 6.06    | 8.14  | 7.46     | 7.17         | 7.30  | 6.71             |
| <b>24TS<sub>1</sub></b>  | 9.05    | 8.74  | 8.97     | 9.07         | 8.79  | 8.97             |
| <b>24TS<sub>2</sub></b>  | 4.87    | 5.60  | 5.24     | 5.23         | 5.25  | 5.02             |
| <b>28H</b>               | 0.00    | 0.00  | 0.00     | 0.00         | 0.00  | 0.00             |
| <b>28M</b>               | -0.73   | 7.02  | 4.95     | 3.28         | 4.48  | 2.18             |
| <b>28M<sub>1A</sub></b>  | 0.46    | 9.73  | 7.42     | 5.43         | 6.80  | 4.17             |
| <b>28M<sub>1B</sub></b>  | 1.82    | 11.10 | 9.05     | 6.92         | 8.29  | 5.71             |
| <b>28F</b>               | -0.38   | 0.35  | -0.76    | -0.57        | -0.02 | -0.51            |
| <b>28TS<sub>1A</sub></b> | 6.33    | 6.62  | 6.08     | 6.26         | 6.44  | 6.24             |
| <b>28TS<sub>1B</sub></b> | 2.86    | 2.76  | 2.22     | 2.47         | 2.68  | 2.54             |
| <b>28TS<sub>2A</sub></b> | 6.87    | 17.42 | 14.11    | 11.99        | 13.99 | 10.72            |
| <b>28TS<sub>2B</sub></b> | 9.89    | 19.78 | 16.49    | 14.59        | 16.46 | 13.34            |
| <b>28TS<sub>3</sub></b>  | 5.17    | 5.69  | 4.53     | 4.93         | 5.28  | 4.88             |
| <b>32F</b>               | 0.00    | 0.00  | 0.00     | 0.00         | 0.00  | 0.00             |
| <b>32M<sub>a</sub></b>   | 16.81   | 22.02 | 21.89    | 20.56        | 20.27 | 21.65            |
| <b>32M<sub>b</sub></b>   | 16.74   | 24.11 | 24.07    | 21.97        | 21.98 | 24.07            |
| <b>32H</b>               | 34.60   | 31.40 | 33.25    | 33.82        | 32.40 | 33.84            |
| <b>32TS<sub>1</sub></b>  | 17.49   | 15.84 | 16.49    | 16.91        | 16.29 | - <sup>[b]</sup> |
| <b>32TS<sub>2</sub></b>  | 33.79   | 30.20 | 31.89    | 32.71        | 31.26 | 32.40            |
| <b>RMSD</b>              | -       | 5.1   | 3.9      | 2.8          | 3.5   | 2.7              |
| <b>MUE</b>               | -       | 3.5   | 2.6      | 1.8          | 2.3   |                  |

<sup>[a]</sup> The structures highlighted in grey exhibit energy differences larger than 4.0 kcal mol<sup>-1</sup> with respect to the canonical CCSD(T) energies. <sup>[b]</sup> The SCS-DCSD calculation crashed twice for the **32TS<sub>1</sub>** structure after several days.

**Table S5.** Relative energies for the different minima and TSs involved in the topology interconversions of several expanded porphyrins computed with several second- and third-order MP approaches. The statistical errors (in kcal mol<sup>-1</sup>) are computed with respect canonical CCSD(T)/cc-pVDZ data.<sup>[a]</sup>

| system                   | CCSD(T) | MP2    | OO-MP2 | SCS-MP2 | S2-MP2 | SOS-MP2    | MP3   | SCS-MP3    | MP2.5 | MP2.X      |
|--------------------------|---------|--------|--------|---------|--------|------------|-------|------------|-------|------------|
| <b>24H<sub>a</sub></b>   | 9.12    | 8.53   | 7.53   | 8.71    | 8.73   | 8.80       | 8.71  | 8.75       | 8.62  | 8.66       |
| <b>24H<sub>b</sub></b>   | 0.00    | 0.00   | 0.00   | 0.00    | 0.00   | 0.00       | 0.00  | 0.00       | 0.00  | 0.00       |
| <b>24M</b>               | 6.06    | 3.18   | -0.75  | 5.43    | 3.69   | 6.55       | 8.04  | 6.64       | 5.61  | 6.68       |
| <b>24TS<sub>1</sub></b>  | 9.05    | 9.49   | 9.51   | 8.91    | 9.35   | 8.62       | 8.97  | 8.78       | 9.23  | 9.11       |
| <b>24TS<sub>2</sub></b>  | 4.87    | 4.17   | 2.11   | 4.85    | 4.30   | 5.19       | 5.79  | 5.26       | 4.98  | 5.34       |
| <b>28H</b>               | 0.00    | 0.00   | 0.00   | 0.00    | 0.00   | 0.00       | 0.00  | 0.00       | 0.00  | 0.00       |
| <b>28M</b>               | -0.73   | -14.62 | -20.44 | -4.74   | -12.13 | 0.20       | 5.48  | 0.29       | -4.57 | -0.15      |
| <b>28M<sub>1A</sub></b>  | 0.46    | -18.75 | -19.37 | -6.31   | -15.59 | -0.09      | 7.16  | 0.17       | -5.79 | -0.09      |
| <b>28M<sub>1B</sub></b>  | 1.82    | -16.34 | -17.25 | -4.11   | -13.16 | 2.00       | 8.83  | 2.18       | -3.75 | 1.78       |
| <b>28F</b>               | -0.38   | -2.32  | -5.18  | -0.95   | -2.15  | -0.27      | 1.25  | -0.06      | -0.54 | 0.25       |
| <b>28TS<sub>1A</sub></b> | 6.33    | 8.46   | 1.88   | 8.31    | 8.36   | 8.24       | 7.96  | 8.19       | 8.21  | 8.10       |
| <b>28TS<sub>1B</sub></b> | 2.86    | 3.34   | -0.64  | 3.30    | 3.23   | 3.28       | 3.28  | 3.29       | 3.31  | 3.30       |
| <b>28TS<sub>2A</sub></b> | 6.87    | -13.34 | -17.13 | 0.67    | -9.89  | 7.67       | 15.66 | 7.92       | 1.16  | 7.54       |
| <b>28TS<sub>2B</sub></b> | 9.89    | -7.58  | -14.22 | 5.13    | -4.51  | 11.48      | 18.46 | 11.64      | 5.44  | 11.17      |
| <b>28TS<sub>3</sub></b>  | 5.17    | 5.97   | -3.10  | 6.37    | 5.89   | 6.58       | 7.49  | 6.75       | 6.73  | 7.06       |
| <b>32F</b>               | 0.00    | 0.00   | 0.00   | 0.00    | 0.00   | 0.00       | 0.00  | 0.00       | 0.00  | 0.00       |
| <b>32M<sub>a</sub></b>   | 16.81   | 10.16  | 3.72   | 15.11   | 11.55  | 17.58      | 19.92 | 17.55      | 15.04 | 17.19      |
| <b>32M<sub>b</sub></b>   | 16.74   | 4.97   | 4.05   | 12.98   | 7.27   | 16.99      | 21.52 | 17.12      | 13.24 | 16.88      |
| <b>32H</b>               | 34.60   | 40.76  | 43.56  | 35.87   | 39.66  | 33.43      | 30.72 | 33.36      | 35.74 | 33.53      |
| <b>32TS<sub>1</sub></b>  | 17.49   | 21.11  | 20.73  | 18.58   | 20.49  | 17.32      | 15.77 | 17.25      | 18.44 | 17.27      |
| <b>32TS<sub>2</sub></b>  | 33.79   | 41.01  | 43.54  | 35.47   | 39.68  | 32.70      | 29.96 | 32.71      | 35.49 | 33.06      |
| <b>RMSD</b>              | -       | 9.5    | 12.0   | 3.0     | 7.9    | <b>0.8</b> | 4.2   | <b>0.9</b> | 2.8   | <b>0.8</b> |
| <b>MUE</b>               | -       | 6.4    | 8.9    | 2.0     | 5.3    | <b>0.6</b> | 3.0   | <b>0.7</b> | 1.9   | <b>0.6</b> |

<sup>[a]</sup> The structures highlighted in grey exhibit energy differences larger than 4.0 kcal mol<sup>-1</sup> with respect to the canonical CCSD(T) energies.

**Table S6.** Breakdown of the reference CCSD(T)/cc-pVDZ relative energies for the expanded porphyrin database into the SCF, CCSD and (T) components. The statistical errors (in kcal mol<sup>-1</sup>) are computed with respect canonical CCSD(T)/cc-pVDZ data.

| system                   | SCF   | CCSD  | CCSD(T) | (T) <sup>[a]</sup> | MP2    | CCSD-MP2 | CCSD(T)-MP2 |
|--------------------------|-------|-------|---------|--------------------|--------|----------|-------------|
| <b>24H<sub>a</sub></b>   | 6.51  | 9.23  | 9.12    | -0.11              | 8.53   | 0.70     | 0.59        |
| <b>24H<sub>b</sub></b>   | 0.00  | 0.00  | 0.00    | 0.00               | 0.00   | 0.00     | 0.00        |
| <b>24M</b>               | 12.25 | 8.14  | 6.06    | -2.08              | 3.18   | 4.96     | 2.88        |
| <b>24TS<sub>1</sub></b>  | 7.36  | 8.74  | 9.05    | 0.31               | 9.49   | -0.75    | 0.45        |
| <b>24TS<sub>2</sub></b>  | 7.48  | 5.60  | 4.87    | -0.73              | 4.17   | 1.43     | 0.70        |
| <b>28H</b>               | 0.00  | 0.00  | 0.00    | 0.00               | 0.00   | 0.00     | 0.00        |
| <b>28M</b>               | 21.32 | 7.02  | -0.73   | -7.75              | -14.62 | 21.64    | 13.89       |
| <b>28M<sub>1A</sub></b>  | 25.98 | 9.73  | 0.46    | -9.28              | -18.75 | 28.49    | 19.21       |
| <b>28M<sub>1B</sub></b>  | 26.35 | 11.10 | 1.82    | -9.28              | -16.34 | 27.44    | 18.16       |
| <b>28F</b>               | 5.55  | 0.35  | -0.38   | -0.74              | -2.32  | 2.68     | 1.94        |
| <b>28TS<sub>1A</sub></b> | 8.94  | 6.62  | 6.33    | -0.29              | 8.46   | -1.84    | 2.13        |
| <b>28TS<sub>1B</sub></b> | 4.90  | 2.76  | 2.86    | 0.11               | 3.34   | -0.58    | 0.47        |
| <b>28TS<sub>2A</sub></b> | 39.01 | 17.42 | 6.87    | -10.55             | -13.34 | 30.76    | 20.21       |
| <b>28TS<sub>2B</sub></b> | 40.78 | 19.78 | 9.89    | -9.89              | -7.58  | 27.36    | 17.48       |
| <b>28TS<sub>3</sub></b>  | 10.63 | 5.69  | 5.17    | -0.52              | 5.97   | -0.28    | 0.81        |
| <b>32F</b>               | 0.00  | 0.00  | 0.00    | 0.00               | 0.00   | 0.00     | 0.00        |
| <b>32M<sub>a</sub></b>   | 25.71 | 22.02 | 16.81   | -5.21              | 10.16  | 11.85    | 6.65        |
| <b>32M<sub>b</sub></b>   | 29.12 | 24.11 | 16.74   | -7.37              | 4.97   | 19.14    | 11.77       |
| <b>32H</b>               | 20.71 | 31.40 | 34.60   | 3.21               | 40.76  | -9.36    | 6.16        |
| <b>32TS<sub>1</sub></b>  | 11.63 | 15.84 | 17.49   | 1.64               | 21.11  | -5.26    | 3.62        |
| <b>32TS<sub>2</sub></b>  | 19.78 | 30.20 | 33.79   | 3.59               | 41.01  | -10.81   | 7.23        |
| <b>RMSD</b>              | 14.66 | 5.14  |         |                    | 9.54   |          |             |

<sup>[a]</sup> The structures highlighted in grey exhibit energy contributions from the triple excitations (T) larger than 5.0 kcal mol<sup>-1</sup>.

**Table S7.** Deviations with respect to canonical CCSD(T)/cc-pVDZ relative energies (in kcal mol<sup>-1</sup>) for the expanded porphyrin database obtained with DLPNO-CCSD(T) using different settings.

| system                   | CCSD(T)   | DLPNO-CCSD(T <sub>1</sub> ) |          |
|--------------------------|-----------|-----------------------------|----------|
|                          | canonical | NormalPNO                   | TightPNO |
| <b>24H<sub>a</sub></b>   | 9.1       | 0.8                         | 0.2      |
| <b>24H<sub>b</sub></b>   | 0.0       | 0.0                         | 0.0      |
| <b>24M</b>               | 6.1       | 0.4                         | 0.4      |
| <b>24TS<sub>1</sub></b>  | 9.0       | -0.1                        | -0.1     |
| <b>24TS<sub>2</sub></b>  | 4.9       | 0.0                         | 0.1      |
| <b>28F</b>               | -0.4      | -1.5                        | -1.0     |
| <b>28M</b>               | 0.5       | 1.3                         | 1.7      |
| <b>28M<sub>1A</sub></b>  | -0.7      | 2.1                         | 1.7      |
| <b>28M<sub>1B</sub></b>  | 1.8       | 2.5                         | 1.9      |
| <b>28TS<sub>3</sub></b>  | 5.2       | -0.9                        | -0.4     |
| <b>28R</b>               | 0.0       | 0.0                         | 0.0      |
| <b>28TS<sub>1A</sub></b> | 6.3       | -0.3                        | 0.1      |
| <b>28TS<sub>1B</sub></b> | 2.9       | -0.8                        | -0.4     |
| <b>28TS<sub>2A</sub></b> | 6.9       | 1.8                         | 2.2      |
| <b>28TS<sub>2B</sub></b> | 9.9       | 2.3                         | 2.0      |
| <b>32F</b>               | 0.0       | 0.0                         | 0.0      |
| <b>32H</b>               | 34.6      | 0.3                         | 0.3      |
| <b>32TS<sub>2</sub></b>  | 33.8      | -0.1                        | 0.1      |
| <b>32M<sub>a</sub></b>   | 16.8      | 4.0                         | 2.5      |
| <b>32M<sub>b</sub></b>   | 16.7      | 4.7                         | 3.3      |
| <b>32TS<sub>1</sub></b>  | 17.5      | 0.1                         | -0.1     |
| <b>MUE</b>               |           | 1.14                        | 0.87     |
| <b>RMSD</b>              |           | 1.74                        | 1.33     |
| <b>Möbius (-like)</b>    |           | 2.73                        | 2.11     |
| <b>Other structures</b>  |           | 0.59                        | 0.33     |

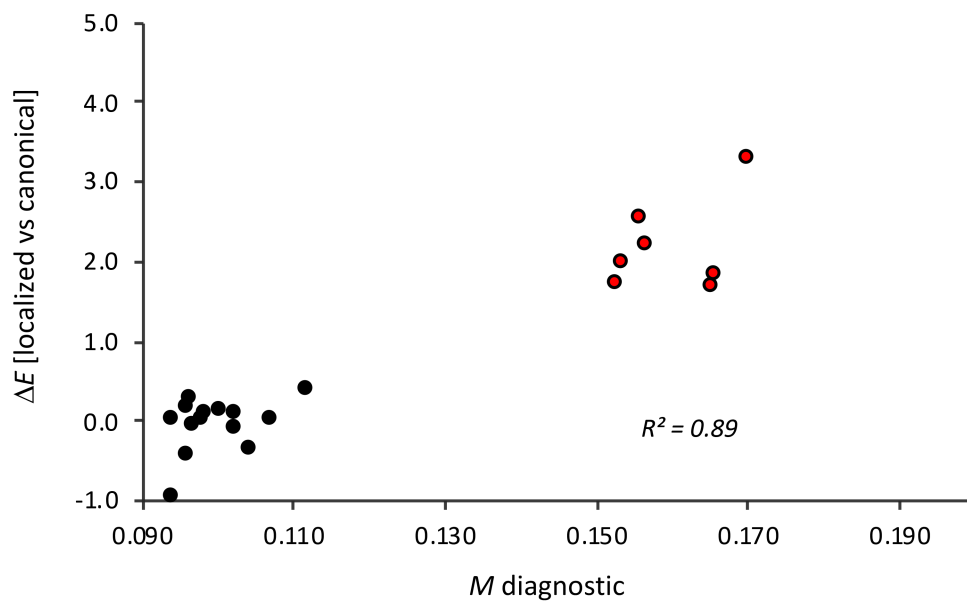

**Figure S10.** Relationship between the energy differences computed with localized DLPNO-CCSD( $T_1$ ) and canonical CCSD( $T$ ) methods and the  $M$  diagnostic for static correlation. The Möbius structures are highlighted in red.

## VII. Performance of DFT methods

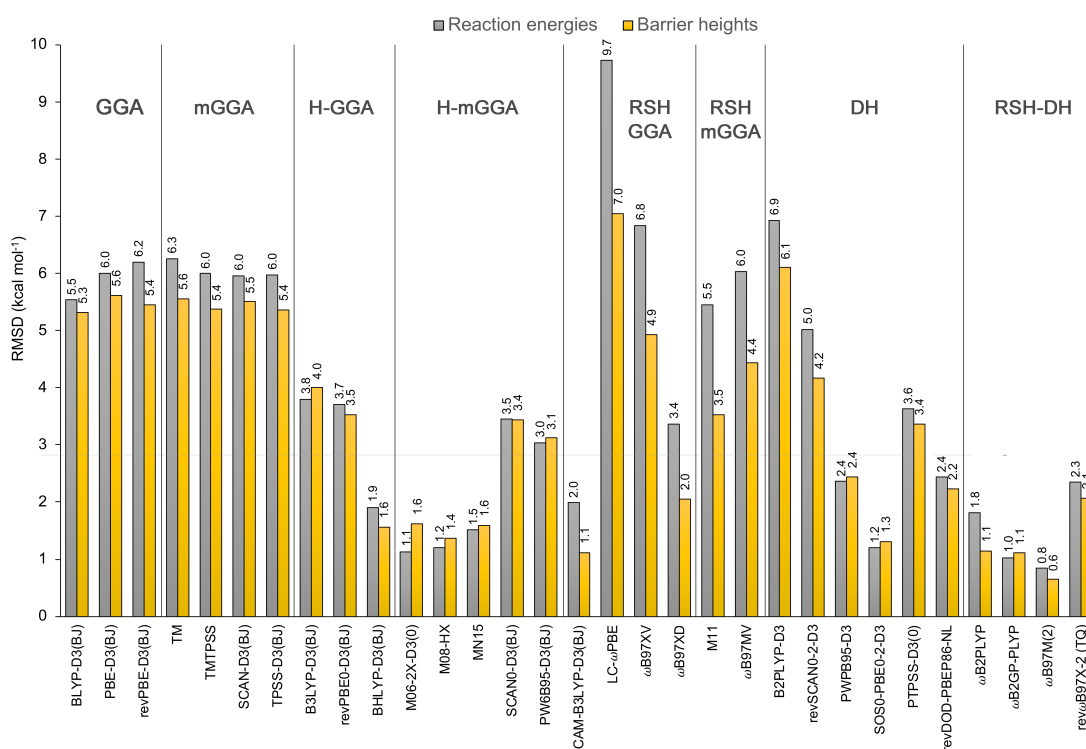

**Figure S11.** Root-mean-square deviations (RMSDs in kcal mol<sup>-1</sup>) for DFT methods over the reaction energies and barrier heights of the topology interconversions of the expanded porphyrin database relative to canonical CCSD(T)/CBS reference values.

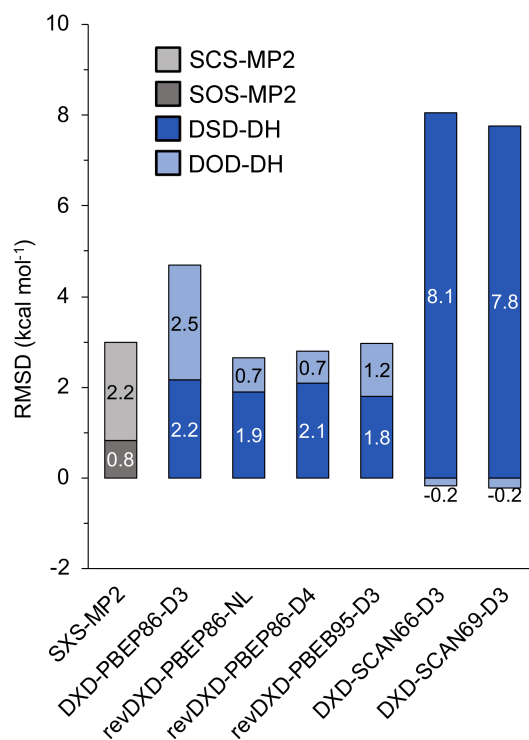

**Figure S12.** RMSDs values for spin-component (DSD) and spin-opposite (DOD) scaled double hybrids. The errors for SCS-MP2 and SOS-MP2 are also displayed for comparison.

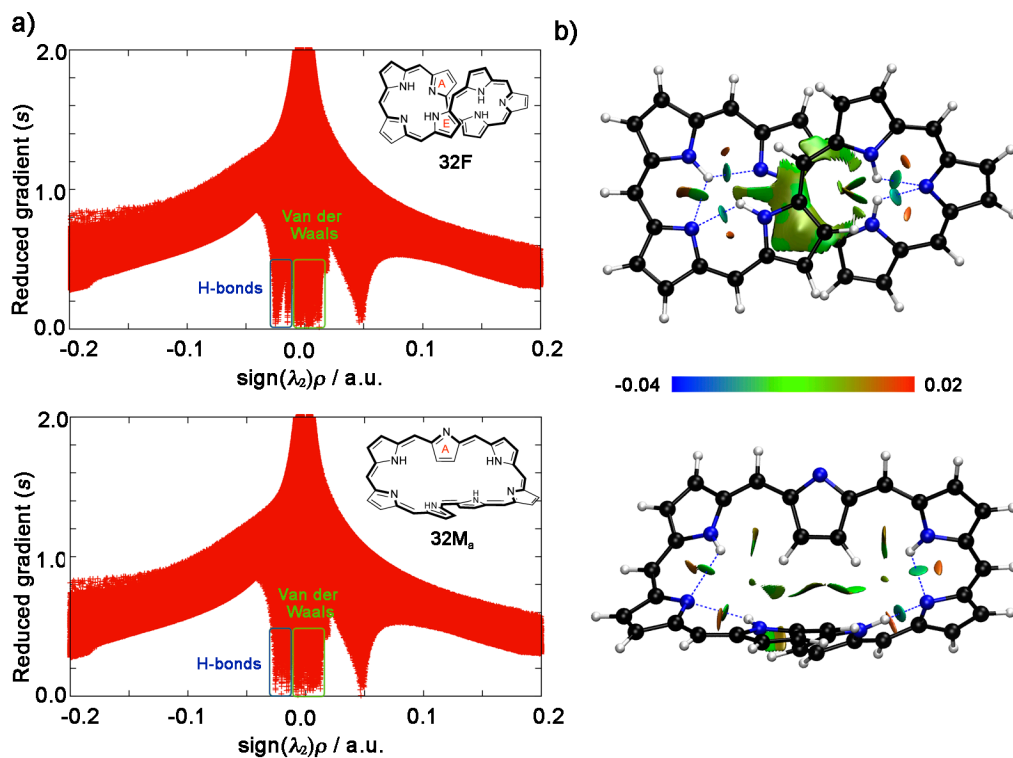

**Figure S13.** Noncovalent interactions in twisted-Hückel and Möbius topologies of neutral [32]heptaphyrin, as revealed by the NCI method. Reduced density gradient  $s(\rho)$



plots (left) and gradient isosurfaces ( $s = 0.4$  a.u., right) coloured according to values of  $\text{sign}(\lambda_2)\rho$ , ranging from -0.04 to 0.02 a.u.

**Table S8.** Relative energies for the different minima and TSs involved in the topology interconversions of several expanded porphyrins computed with several DFT approaches together with def2-TZVP basis set. The statistical errors (in kcal mol<sup>-1</sup>) are computed with respect canonical CCSD(T)/CBS data.<sup>[a]</sup>

| system                   | BLYP        | BLYP-D3     | PBE         | PBE-D3      | revPBE      | revPBE-D3   | TM          | TMTPSS      | SCAN        | SCAN-D3     |
|--------------------------|-------------|-------------|-------------|-------------|-------------|-------------|-------------|-------------|-------------|-------------|
| <b>24H<sub>a</sub></b>   | 1.53        | 2.38        | 5.31        | 4.33        | 1.22        | 4.88        | 4.55        | 4.49        | 4.32        | 4.97        |
| <b>24H<sub>b</sub></b>   | 0.00        | 0.00        | 0.00        | 0.00        | 0.00        | 0.00        | 0.00        | 0.00        | 0.00        | 0.00        |
| <b>24M</b>               | 2.87        | 2.06        | 1.81        | 1.46        | 2.31        | 2.19        | 2.81        | 3.05        | 3.10        | 2.99        |
| <b>24TS<sub>1</sub></b>  | 5.68        | 6.65        | 8.20        | 7.90        | 5.42        | 8.12        | 8.74        | 8.67        | 8.33        | 8.70        |
| <b>24TS<sub>2</sub></b>  | 4.01        | 3.81        | 3.99        | 3.74        | 3.31        | 3.63        | 4.13        | 4.28        | 4.27        | 4.22        |
| <b>28F</b>               | 5.67        | 1.08        | 3.12        | 0.26        | 3.14        | 1.52        | 3.30        | 4.03        | 3.81        | 2.96        |
| <b>28M<sub>1A</sub></b>  | -2.20       | -6.43       | -4.76       | -7.12       | -3.68       | -6.86       | -5.83       | -5.03       | -4.98       | -5.75       |
| <b>28M</b>               | -3.24       | -7.53       | -5.85       | -8.24       | -4.55       | -7.94       | -7.05       | -6.23       | -6.24       | -7.04       |
| <b>28M<sub>1B</sub></b>  | -0.79       | -4.67       | -3.13       | -5.27       | -2.20       | -5.12       | -4.15       | -3.42       | -3.41       | -4.10       |
| <b>28H</b>               | 0.00        | 0.00        | 0.00        | 0.00        | 0.00        | 0.00        | 0.00        | 0.00        | 0.00        | 0.00        |
| <b>28TS<sub>1A</sub></b> | 7.84        | 7.18        | 7.35        | 6.94        | 7.43        | 7.11        | 7.78        | 8.10        | 7.89        | 7.71        |
| <b>28TS<sub>1B</sub></b> | 5.45        | 5.01        | 5.11        | 4.80        | 4.98        | 4.90        | 5.34        | 5.58        | 5.52        | 5.35        |
| <b>28TS<sub>2A</sub></b> | 3.72        | -1.15       | -0.51       | -3.19       | 1.53        | -2.59       | 0.09        | 2.14        | -0.46       | -1.37       |
| <b>28TS<sub>2B</sub></b> | 6.56        | 1.56        | 2.22        | -0.52       | 4.39        | 0.26        | 3.01        | 5.12        | 2.49        | 1.56        |
| <b>28TS<sub>3</sub></b>  | 9.08        | 7.78        | 8.28        | 7.26        | 8.75        | 7.08        | 8.96        | 9.58        | 9.39        | 8.51        |
| <b>32F</b>               | 0.00        | 0.00        | 0.00        | 0.00        | 0.00        | 0.00        | 0.00        | 0.00        | 0.00        | 0.00        |
| <b>32H</b>               | 16.47       | 36.10       | 23.12       | 34.13       | 19.48       | 32.21       | 29.56       | 28.61       | 28.95       | 32.43       |
| <b>32M<sub>a</sub></b>   | -2.92       | 9.25        | 0.58        | 7.39        | 0.28        | 5.81        | 4.17        | 4.06        | 4.33        | 6.14        |
| <b>32M<sub>b</sub></b>   | -2.83       | 10.60       | 1.09        | 8.62        | 0.50        | 7.09        | 4.98        | 4.75        | 4.94        | 6.97        |
| <b>32TS<sub>1</sub></b>  | 8.61        | 18.26       | 11.95       | 17.14       | 10.65       | 16.09       | 15.96       | 15.64       | 15.67       | 16.99       |
| <b>32TS<sub>2</sub></b>  | 16.95       | 37.67       | 24.20       | 35.71       | 21.55       | 33.79       | 31.40       | 30.50       | 30.84       | 34.07       |
| <b>RMSD</b>              | <b>8.25</b> | <b>4.49</b> | <b>6.38</b> | <b>4.97</b> | <b>6.92</b> | <b>4.97</b> | <b>4.95</b> | <b>4.78</b> | <b>4.95</b> | <b>4.64</b> |
| <b>MUE</b>               | <b>5.65</b> | <b>3.78</b> | <b>4.79</b> | <b>3.81</b> | <b>5.19</b> | <b>3.66</b> | <b>3.71</b> | <b>3.60</b> | <b>3.78</b> | <b>3.52</b> |

**Table S9.** Relative energies for the different minima and TSs involved in the topology interconversions of several expanded porphyrins computed with several DFT approaches together with def2-TZVP basis set. The statistical errors (in kcal mol<sup>-1</sup>) are computed with respect canonical CCSD(T)/CBS data.<sup>[a]</sup>

| system                   | TPSS        | TPSS-D3     | B3LYP       | B3LYP-D3    | PBE0        | PBE0-D3     | revPBE0     | revPBE0-D3  | BHLYP       | BHLYP-D3    |
|--------------------------|-------------|-------------|-------------|-------------|-------------|-------------|-------------|-------------|-------------|-------------|
| <b>24H<sub>a</sub></b>   | 1.61        | 4.05        | 2.80        | 5.90        | 3.61        | 5.26        | 2.74        | 5.92        | 4.55        | 6.85        |
| <b>24H<sub>b</sub></b>   | 0.00        | 0.00        | 0.00        | 0.00        | 0           | 0.00        | 0.00        | 0.00        | 0.00        | 0.00        |
| <b>24M</b>               | 2.71        | 2.49        | 4.51        | 4.09        | 4.9         | 4.43        | 4.63        | 4.50        | 7.69        | 7.53        |
| <b>24TS<sub>1</sub></b>  | 6.42        | 8.01        | 6.48        | 8.55        | 7.33        | 8.36        | 6.39        | 8.70        | 7.38        | 8.91        |
| <b>24TS<sub>2</sub></b>  | 3.69        | 3.73        | 4.51        | 4.54        | 4.54        | 4.55        | 4.45        | 4.71        | 5.93        | 6.02        |
| <b>28F</b>               | 2.58        | 1.11        | 4.03        | 1.58        | 2.70        | 1.44        | 3.02        | 1.51        | 4.28        | 2.96        |
| <b>28M<sub>1A</sub></b>  | -4.51       | -6.76       | -0.89       | -3.93       | -1.84       | -5.15       | -0.74       | -3.53       | 5.68        | 3.63        |
| <b>28M</b>               | -5.48       | -7.85       | -2.17       | -5.30       | -3.26       | -3.66       | -2.04       | -5.00       | 3.82        | 1.66        |
| <b>28M<sub>1B</sub></b>  | -2.90       | -4.95       | 0.54        | -2.22       | -0.26       | -1.92       | 0.68        | -1.87       | 6.98        | 5.12        |
| <b>28H</b>               | 0.00        | 0.00        | 0.00        | 0.00        | 0.00        | 0.00        | 0.00        | 0.00        | 0.00        | 0.00        |
| <b>28TS<sub>1A</sub></b> | 7.60        | 7.23        | 7.69        | 7.14        | 7.32        | 6.93        | 7.42        | 7.11        | 7.74        | 7.42        |
| <b>28TS<sub>1B</sub></b> | 5.16        | 4.88        | 4.89        | 4.49        | 4.51        | 4.18        | 4.50        | 4.38        | 4.47        | 4.25        |
| <b>28TS<sub>2A</sub></b> | 1.14        | -1.73       | 5.99        | 1.68        | 3.47        | 1.22        | 5.59        | 2.01        | 14.41       | 11.82       |
| <b>28TS<sub>2B</sub></b> | 3.97        | 1.07        | 9.09        | 4.37        | 6.45        | 4.15        | 8.54        | 4.94        | 17.54       | 14.92       |
| <b>28TS<sub>3</sub></b>  | 8.63        | 6.97        | 9.73        | 8.25        | 8.62        | 7.12        | 8.80        | 7.24        | 9.90        | 8.46        |
| <b>32F</b>               | 0.00        | 0.00        | 0.00        | 0.00        | 0.00        | 0.00        | 0.00        | 0.00        | 0.00        | 0.00        |
| <b>32H</b>               | 23.07       | 32.47       | 21.91       | 35.60       | 23.86       | 32.17       | 21.04       | 32.17       | 22.76       | 31.11       |
| <b>32M<sub>a</sub></b>   | 1.78        | 6.34        | 3.82        | 11.27       | 4.29        | 9.20        | 4.37        | 9.25        | 11.04       | 14.98       |
| <b>32M<sub>b</sub></b>   | 2.11        | 7.33        | 4.00        | 12.41       | 4.70        | 10.04       | 4.40        | 10.20       | 11.28       | 15.81       |
| <b>32TS<sub>1</sub></b>  | 12.57       | 16.52       | 11.90       | 18.14       | 12.56       | 16.30       | 11.50       | 16.23       | 12.51       | 16.01       |
| <b>32TS<sub>2</sub></b>  | 25.18       | 34.06       | 23.50       | 36.92       | 24.61       | 33.08       | 22.47       | 33.15       | 23.51       | 31.41       |
| <b>RMSD</b>              | <b>6.01</b> | <b>4.76</b> | <b>5.35</b> | <b>3.01</b> | <b>4.86</b> | <b>3.11</b> | <b>5.36</b> | <b>2.90</b> | <b>5.11</b> | <b>2.67</b> |
| <b>MUE</b>               | <b>4.65</b> | <b>3.56</b> | <b>3.61</b> | <b>2.56</b> | <b>3.48</b> | <b>2.31</b> | <b>3.56</b> | <b>2.18</b> | <b>4.17</b> | <b>1.95</b> |

**Table S10.** Relative energies for the different minima and TSs involved in the topology interconversions of several expanded porphyrins computed with several DFT approaches together with def2-TZVP basis set. The statistical errors (in kcal mol<sup>-1</sup>) are computed with respect canonical CCSD(T)/CBS data.<sup>[a]</sup>

| system                   | M06         | M06-2X      | M06-2X-D3(0) | M08-HX      | MN15        | SCAN0       | SCAN0-D3    | PW6B95      | PW6B95-D3   |
|--------------------------|-------------|-------------|--------------|-------------|-------------|-------------|-------------|-------------|-------------|
| <b>24H<sub>a</sub></b>   | 7.91        | 8.04        | 7.85         | 6.19        | 5.05        | 5.78        | 4.15        | 5.36        | 7.91        |
| <b>24H<sub>b</sub></b>   | 0.00        | 0.00        | 0.00         | 0.00        | 0.00        | 0.00        | 0.00        | 0.00        | 0.00        |
| <b>24M</b>               | 7.32        | 7.28        | 7.93         | 6.27        | 5.17        | 5.05        | 4.92        | 4.76        | 7.32        |
| <b>24TS<sub>1</sub></b>  | 9.48        | 9.52        | 10.02        | 9.23        | 8.51        | 8.92        | 7.84        | 8.56        | 9.48        |
| <b>24TS<sub>2</sub></b>  | 5.94        | 5.90        | 5.37         | 5.39        | 5.11        | 5.06        | 4.79        | 4.74        | 5.94        |
| <b>28F</b>               | 2.29        | 1.63        | 2.38         | 3.77        | 3.45        | 2.57        | 3.30        | 2.19        | 2.29        |
| <b>28M<sub>1A</sub></b>  | 2.45        | 2.20        | 1.71         | 1.15        | -1.66       | -2.47       | -1.11       | -2.36       | 2.45        |
| <b>28M</b>               | 0.47        | 0.22        | -0.26        | -0.56       | -3.25       | -4.10       | -2.59       | -3.89       | 0.47        |
| <b>28M<sub>1B</sub></b>  | 4.00        | 3.78        | 3.41         | 2.66        | -0.15       | -0.89       | 0.49        | -0.64       | 4.00        |
| <b>28H</b>               | 0.00        | 0.00        | 0.00         | 0.00        | 0.00        | 0.00        | 0.00        | 0.00        | 0.00        |
| <b>28TS<sub>1A</sub></b> | 6.63        | 6.57        | 6.39         | 7.38        | 7.66        | 7.47        | 7.67        | 7.40        | 6.63        |
| <b>28TS<sub>1B</sub></b> | 3.36        | 3.28        | 3.33         | 4.33        | 4.83        | 4.65        | 4.75        | 4.50        | 3.36        |
| <b>28TS<sub>2A</sub></b> | 7.90        | 7.65        | 8.54         | 7.60        | 4.02        | 3.05        | 5.86        | 4.33        | 7.90        |
| <b>28TS<sub>2B</sub></b> | 10.86       | 10.60       | 11.62        | 10.30       | 7.03        | 6.04        | 8.77        | 7.21        | 10.86       |
| <b>28TS<sub>3</sub></b>  | 7.59        | 7.03        | 8.14         | 8.73        | 9.19        | 8.25        | 9.16        | 7.91        | 7.59        |
| <b>32F</b>               | 0.00        | 0.00        | 0.00         | 0.00        | 0.00        | 0.00        | 0.00        | 0.00        | 0.00        |
| <b>32H</b>               | 30.26       | 31.69       | 33.77        | 29.42       | 28.29       | 31.95       | 25.44       | 30.91       | 30.26       |
| <b>32M<sub>a</sub></b>   | 14.22       | 14.92       | 16.32        | 12.38       | 7.55        | 9.50        | 7.01        | 9.86        | 14.22       |
| <b>32M<sub>b</sub></b>   | 14.92       | 15.72       | 17.11        | 12.97       | 7.96        | 10.11       | 7.28        | 10.46       | 14.92       |
| <b>32TS<sub>1</sub></b>  | 15.72       | 16.04       | 18.77        | 16.09       | 15.27       | 16.69       | 14.18       | 16.39       | 15.72       |
| <b>32TS<sub>2</sub></b>  | 34.49       | 35.76       | 34.50        | 30.29       | 29.56       | 32.95       | 26.90       | 32.00       | 34.49       |
| <b>RMSD</b>              | <b>1.69</b> | <b>1.51</b> | <b>1.73</b>  | <b>2.1</b>  | <b>3.38</b> | <b>2.72</b> | <b>3.85</b> | <b>2.51</b> | <b>1.69</b> |
| <b>MUE</b>               | <b>1.40</b> | <b>1.19</b> | <b>1.40</b>  | <b>1.60</b> | <b>2.46</b> | <b>2.03</b> | <b>2.66</b> | <b>1.90</b> | <b>1.40</b> |

**Table S11.** Relative energies for the different minima and TSs involved in the topology interconversions of several expanded porphyrins computed with several DFT approaches together with def2-TZVP basis set. The statistical errors (in kcal mol<sup>-1</sup>) are computed with respect canonical CCSD(T)/CBS data.<sup>[a]</sup>

| system                   | TPSSh       | TPSSh-D3    | CAM-B3LYP   | CAM-B3LYP-D3 | LC-wPBE     | CAM-QTP00   | CAM-QTP00-D3 | CAM-QTP01   | CAM-QTP01-D3 |
|--------------------------|-------------|-------------|-------------|--------------|-------------|-------------|--------------|-------------|--------------|
| <b>24H<sub>a</sub></b>   | 2.21        | 4.59        | 5.14        | 6.96         | 6.48        | 6.69        | 8.00         | 7.08        | 7.93         |
| <b>24H<sub>b</sub></b>   | 0.00        | 0.00        | 0.00        | 0.00         | 0.00        | 0.00        | 0.00         | 0.00        | 0.00         |
| <b>24M</b>               | 3.59        | 3.35        | 7.32        | 7.09         | 12.05       | 10.10       | 9.90         | 9.24        | 9.10         |
| <b>24TS<sub>1</sub></b>  | 6.75        | 8.27        | 7.28        | 8.39         | 7.80        | 8.26        | 9.01         | 8.21        | 8.68         |
| <b>24TS<sub>2</sub></b>  | 4.11        | 4.12        | 5.51        | 5.46         | 5.44        | 6.76        | 6.67         | 6.20        | 6.13         |
| <b>28F</b>               | 2.56        | 1.03        | 2.41        | 0.97         | 0.87        | 2.95        | 1.55         | 1.21        | 0.13         |
| <b>28M<sub>1A</sub></b>  | -3.35       | -5.59       | 5.09        | 3.27         | 13.86       | 13.85       | 12.43        | 11.58       | 10.61        |
| <b>28M</b>               | -4.50       | -6.85       | 3.21        | 1.30         | 10.54       | 10.66       | 9.17         | 8.46        | 7.46         |
| <b>28M<sub>1B</sub></b>  | -1.79       | -3.82       | 6.61        | 4.95         | 15.32       | 15.17       | 13.88        | 13.11       | 12.24        |
| <b>28H</b>               | 0.00        | 0.00        | 0.00        | 0.00         | 0.00        | 0.00        | 0.00         | 0.00        | 0.00         |
| <b>28TS<sub>1A</sub></b> | 7.63        | 7.24        | 6.59        | 6.21         | 5.71        | 6.74        | 6.41         | 5.77        | 5.54         |
| <b>28TS<sub>1B</sub></b> | 5.00        | 4.69        | 3.44        | 3.10         | 2.36        | 3.34        | 3.02         | 2.47        | 2.24         |
| <b>28TS<sub>2A</sub></b> | 2.74        | -0.09       | 11.67       | 9.40         | 19.60       | 22.02       | 20.30        | 17.42       | 16.27        |
| <b>28TS<sub>2B</sub></b> | 5.65        | 2.78        | 14.60       | 12.30        | 21.70       | 24.61       | 22.85        | 19.83       | 18.67        |
| <b>28TS<sub>3</sub></b>  | 8.67        | 6.92        | 7.82        | 6.15         | 6.13        | 8.19        | 6.63         | 6.39        | 5.24         |
| <b>32F</b>               | 0.00        | 0.00        | 0.00        | 0.00         | 0.00        | 0.00        | 0.00         | 0.00        | 0.00         |
| <b>32H</b>               | 23.37       | 32.81       | 24.03       | 31.92        | 21.87       | 25.09       | 31.49        | 26.89       | 31.28        |
| <b>32M<sub>a</sub></b>   | 3.08        | 7.75        | 12.65       | 16.73        | 17.89       | 20.64       | 24.08        | 20.78       | 23.15        |
| <b>32M<sub>b</sub></b>   | 3.35        | 8.66        | 13.26       | 17.82        | 21.54       | 22.94       | 26.72        | 23.31       | 25.91        |
| <b>32TS<sub>1</sub></b>  | 12.69       | 16.66       | 12.60       | 15.88        | 10.87       | 13.23       | 15.81        | 13.64       | 15.35        |
| <b>32TS<sub>2</sub></b>  | 25.18       | 34.07       | 24.39       | 31.77        | 20.81       | 24.74       | 30.69        | 26.36       | 30.43        |
| <b>RMSD</b>              | <b>5.41</b> | <b>3.97</b> | <b>4.02</b> | <b>1.78</b>  | <b>7.63</b> | <b>7.76</b> | <b>6.99</b>  | <b>6.10</b> | <b>5.65</b>  |
| <b>MUE</b>               | <b>4.08</b> | <b>3.01</b> | <b>3.20</b> | <b>1.33</b>  | <b>5.40</b> | <b>5.62</b> | <b>4.62</b>  | <b>4.37</b> | <b>3.68</b>  |

**Table S12.** Relative energies for the different minima and TSs involved in the topology interconversions of several expanded porphyrins computed with several DFT approaches together with def2-TZVP basis set. The statistical errors (in kcal mol<sup>-1</sup>) are computed with respect canonical CCSD(T)/CBS data.<sup>[a]</sup>

| system                   | $\omega$ B97XV | $\omega$ B97XD | M11         | $\omega$ B97MV | B2LYP       | B2LYP-D3    | SCAN0-2     | revSCAN0-2  | revSCAN0-2-D3 |
|--------------------------|----------------|----------------|-------------|----------------|-------------|-------------|-------------|-------------|---------------|
| <b>24H<sub>a</sub></b>   | 8.68           | 7.91           | 8.97        | 8.92           | 4.96        | 6.52        | 7.04        | 7.31        | 7.60          |
| <b>24H<sub>b</sub></b>   | 0.00           | 0.00           | 0.00        | 0.00           | 0.00        | 0.00        | 0.00        | 0.00        | 0.00          |
| <b>24M</b>               | 8.54           | 8.62           | 10.25       | 8.33           | 3.46        | 3.00        | 4.69        | 5.06        | 5.55          |
| <b>24TS<sub>1</sub></b>  | 8.72           | 8.73           | 9.92        | 8.88           | 7.74        | 8.74        | 9.19        | 8.89        | 8.98          |
| <b>24TS<sub>2</sub></b>  | 5.84           | 5.00           | 5.56        | 5.79           | 4.27        | 4.22        | 4.81        | 4.85        | 5.04          |
| <b>28F</b>               | -1.28          | 1.30           | 1.04        | -0.82          | 1.82        | -0.34       | -0.15       | -0.02       | 0.08          |
| <b>28M<sub>1A</sub></b>  | 9.38           | 4.78           | 7.30        | 8.04           | -7.27       | -9.08       | -12.20      | -9.26       | -6.95         |
| <b>28M</b>               | 6.47           | 2.84           | 4.78        | 5.24           | -8.30       | -10.14      | -11.01      | -8.48       | -6.60         |
| <b>28M<sub>1B</sub></b>  | 10.95          | 6.61           | 9.05        | 9.67           | -5.67       | -7.32       | -10.17      | -7.27       | -5.00         |
| <b>28H</b>               | 0.00           | 0.00           | 0.00        | 0.00           | 0.00        | 0.00        | 0.00        | 0.00        | 0.00          |
| <b>28TS<sub>1A</sub></b> | 5.14           | 6.11           | 5.43        | 4.77           | 6.67        | 6.34        | 6.57        | 6.49        | 6.48          |
| <b>28TS<sub>1B</sub></b> | 1.81           | 2.86           | 1.96        | 1.42           | 3.74        | 3.48        | 3.08        | 2.98        | 2.98          |
| <b>28TS<sub>2A</sub></b> | 15.38          | 10.32          | 12.78       | 14.19          | -1.77       | -3.77       | -7.25       | -3.95       | -1.39         |
| <b>28TS<sub>2B</sub></b> | 17.73          | 12.76          | 15.05       | 16.58          | 1.19        | -0.84       | -2.77       | 0.29        | 2.66          |
| <b>28TS<sub>3</sub></b>  | 4.41           | 6.72           | 6.18        | 4.00           | 7.55        | 6.78        | 6.04        | 5.84        | 5.83          |
| <b>32F</b>               | 0.00           | 0.00           | 0.00        | 0.00           | 0.00        | 0.00        | 0.00        | 0.00        | 0.00          |
| <b>32H</b>               | 31.16          | 34.20          | 34.20       | 31.51          | 29.55       | 38.05       | 35.15       | 33.92       | 33.87         |
| <b>32M<sub>a</sub></b>   | 23.05          | 19.73          | 22.79       | 22.38          | 4.27        | 9.60        | 8.15        | 9.68        | 11.34         |
| <b>32M<sub>b</sub></b>   | 25.39          | 21.87          | 25.20       | 24.49          | 3.66        | 9.51        | 3.75        | 6.20        | 8.63          |
| <b>32TS<sub>1</sub></b>  | 15.43          | 17.01          | 18.05       | 15.51          | 15.33       | 19.42       | 18.06       | 17.35       | 17.27         |
| <b>32TS<sub>2</sub></b>  | 30.25          | 34.26          | 34.17       | 30.58          | 30.39       | 39.28       | 35.67       | 34.17       | 33.97         |
| <b>RMSD</b>              | <b>5.15</b>    | <b>2.84</b>    | <b>4.33</b> | <b>4.50</b>    | <b>5.41</b> | <b>5.45</b> | <b>6.69</b> | <b>5.08</b> | <b>3.80</b>   |
| <b>MUE</b>               | <b>3.41</b>    | <b>2.13</b>    | <b>3.10</b> | <b>3.00</b>    | <b>3.95</b> | <b>4.12</b> | <b>4.49</b> | <b>3.37</b> | <b>2.56</b>   |

**Table S13.** Relative energies for the different minima and TSs involved in the topology interconversions of several expanded porphyrins computed with several DFT approaches together with def2-TZVP basis set. The statistical errors (in kcal mol<sup>-1</sup>) are computed with respect canonical CCSD(T)/CBS data.<sup>[a]</sup>

| system                   | PWPB95      | PWPB95-D3   | SOS0-PBE0-2-D3 | PTPSS-D3    | $\omega$ B2PLYP | $\omega$ B2GP-PLYP | $\omega$ B97M(2) | rev $\omega$ B97X-2 (TQ) | dRPA75-D3   |
|--------------------------|-------------|-------------|----------------|-------------|-----------------|--------------------|------------------|--------------------------|-------------|
| <b>24H<sub>a</sub></b>   | 5.64        | 6.56        | 7.88           | 6.82        | 7.51            | 7.56               | 8.12             | 7.64                     | 7.47        |
| <b>24H<sub>b</sub></b>   | 0.00        | 0.00        | 0.00           | 0.00        | 0.00            | 0.00               | 0.00             | 0.00                     | 0.00        |
| <b>24M</b>               | 5.44        | 5.32        | 6.86           | 5.43        | 7.61            | 7.12               | 6.58             | 6.28                     | 4.91        |
| <b>24TS<sub>1</sub></b>  | 8.23        | 8.78        | 9.08           | 9.23        | 8.88            | 9.06               | 8.85             | 8.68                     | 8.91        |
| <b>24TS<sub>2</sub></b>  | 4.93        | 4.90        | 5.52           | 5.17        | 5.73            | 5.61               | 5.20             | 5.21                     | 4.78        |
| <b>28F</b>               | 1.81        | 0.96        | 0.14           | 1.75        | 0.29            | 0.17               | -1.14            | 0.33                     | 0.47        |
| <b>28M<sub>1A</sub></b>  | -1.26       | -2.19       | -1.05          | -3.23       | 2.06            | -1.00              | -0.83            | -3.77                    | -7.62       |
| <b>28M</b>               | -2.74       | -3.71       | -1.74          | -4.57       | 0.92            | -1.38              | -1.98            | -3.24                    | -7.61       |
| <b>28M<sub>1B</sub></b>  | 0.42        | -0.43       | 0.80           | -1.48       | 4.00            | 1.03               | 1.11             | -1.77                    | -5.79       |
| <b>28H</b>               | 0.00        | 0.00        | 0.00           | 0.00        | 0.00            | 0.00               | 0.00             | 0.00                     | 0.00        |
| <b>28TS<sub>1A</sub></b> | 6.96        | 6.75        | 6.49           | 6.99        | 5.82            | 6.02               | 5.16             | 6.07                     | 6.40        |
| <b>28TS<sub>1B</sub></b> | 3.95        | 3.76        | 3.03           | 4.14        | 2.50            | 2.60               | 1.98             | 2.55                     | 3.19        |
| <b>28TS<sub>2A</sub></b> | 5.12        | 3.98        | 5.02           | 3.00        | 7.30            | 4.37               | 4.89             | 1.87                     | -2.00       |
| <b>28TS<sub>2B</sub></b> | 8.02        | 6.86        | 8.61           | 6.15        | 10.78           | 8.26               | 8.18             | 6.05                     | 1.74        |
| <b>28TS<sub>3</sub></b>  | 7.47        | 6.52        | 5.77           | 7.35        | 5.77            | 5.83               | 4.04             | 5.67                     | 5.98        |
| <b>32F</b>               | 0.00        | 0.00        | 0.00           | 0.00        | 0.00            | 0.00               | 0.00             | 0.00                     | 0.00        |
| <b>32H</b>               | 28.24       | 32.33       | 33.60          | 33.20       | 31.81           | 33.04              | 33.55            | 32.44                    | 34.67       |
| <b>32M<sub>a</sub></b>   | 9.47        | 11.61       | 15.65          | 9.80        | 17.47           | 16.26              | 16.31            | 14.59                    | 10.31       |
| <b>32M<sub>b</sub></b>   | 9.83        | 12.20       | 14.77          | 10.46       | 17.73           | 15.68              | 16.05            | 13.24                    | 8.12        |
| <b>32TS<sub>1</sub></b>  | 15.17       | 16.83       | 16.90          | 16.76       | 16.12           | 16.79              | 16.70            | 16.52                    | 17.46       |
| <b>32TS<sub>2</sub></b>  | 29.01       | 32.81       | 33.33          | 33.65       | 31.54           | 32.88              | 33.10            | 32.35                    | 34.94       |
| <b>RMSD</b>              | <b>2.63</b> | <b>1.85</b> | <b>0.87</b>    | <b>2.58</b> | <b>1.28</b>     | <b>0.78</b>        | <b>0.63</b>      | <b>1.83</b>              | <b>4.28</b> |
| <b>MUE</b>               | <b>1.89</b> | <b>1.41</b> | <b>0.64</b>    | <b>1.94</b> | <b>0.97</b>     | <b>0.61</b>        | <b>0.48</b>      | <b>1.17</b>              | <b>2.99</b> |

**Table S14.** Relative energies for the different minima and TSs involved in the topology interconversions of several expanded porphyrins computed with several DFT approaches together with def2-TZVP basis set. The statistical errors (in kcal mol<sup>-1</sup>) are computed with respect canonical CCSD(T) data.<sup>[a]</sup>

| system                   | DSD-PBE86   | DSD-PBE86-D3 | xrevDSD-PBE86-D3 | DOD-PBE86-D3 | revDSD-PBE86-NL | revDOD-PBE86-NL | revDSD-PBE86-D4 | revDOD-PBE86-D4 |
|--------------------------|-------------|--------------|------------------|--------------|-----------------|-----------------|-----------------|-----------------|
| <b>24H<sub>a</sub></b>   | 7.17        | 7.28         | 7.30             | 7.71         | 7.12            | 7.24            | 7.27            | 7.40            |
| <b>24H<sub>b</sub></b>   | 0.00        | 0.00         | 0.00             | 0.00         | 0.00            | 0.00            | 0.00            | 0.00            |
| <b>24M</b>               | 4.26        | 4.82         | 5.56             | 5.73         | 5.53            | 5.90            | 5.54            | 5.85            |
| <b>24TS<sub>1</sub></b>  | 8.97        | 8.96         | 8.76             | 9.05         | 8.52            | 8.59            | 8.75            | 8.77            |
| <b>24TS<sub>2</sub></b>  | 4.50        | 4.75         | 4.98             | 5.10         | 4.90            | 5.05            | 4.99            | 5.11            |
| <b>28F</b>               | -0.64       | 0.13         | 0.57             | 0.42         | 0.17            | 0.21            | 0.89            | 0.99            |
| <b>28M<sub>1A</sub></b>  | -11.32      | -8.52        | -5.20            | -4.55        | -5.13           | -2.77           | -5.29           | -4.09           |
| <b>28M</b>               | -11.18      | -8.04        | -4.31            | -3.35        | -4.28           | -3.83           | -4.46           | -3.11           |
| <b>28M<sub>1B</sub></b>  | -9.36       | -6.18        | -2.52            | -1.56        | -2.49           | -0.99           | -2.68           | -1.33           |
| <b>28H</b>               | 0.00        | 0.00         | 0.00             | 0.00         | 0.00            | 0.00            | 0.00            | 0.00            |
| <b>28TS<sub>1A</sub></b> | 6.19        | 6.35         | 6.38             | 6.35         | 6.27            | 6.27            | 6.46            | 6.47            |
| <b>28TS<sub>1B</sub></b> | 2.90        | 3.14         | 3.20             | 3.23         | 3.00            | 3.00            | 3.23            | 3.24            |
| <b>28TS<sub>2A</sub></b> | -6.52       | -2.77        | 1.45             | 2.40         | 1.42            | 2.91            | 1.11            | 2.58            |
| <b>28TS<sub>2B</sub></b> | -2.68       | 0.76         | 4.83             | 5.58         | 4.78            | 6.18            | 4.50            | 5.90            |
| <b>28TS<sub>3</sub></b>  | 5.24        | 5.80         | 6.03             | 5.85         | 5.67            | 5.68            | 6.25            | 6.29            |
| <b>32F</b>               | 0.00        | 0.00         | 0.00             | 0.00         | 0.00            | 0.00            | 0.00            | 0.00            |
| <b>32H</b>               | 36.37       | 34.89        | 33.37            | 34.44        | 33.15           | 33.06           | 33.43           | 33.20           |
| <b>32M<sub>a</sub></b>   | 8.19        | 9.12         | 11.12            | 12.33        | 11.40           | 12.59           | 11.27           | 12.27           |
| <b>32M<sub>b</sub></b>   | 5.44        | 7.66         | 10.46            | 12.41        | 10.53           | 12.10           | 10.36           | 11.66           |
| <b>32TS<sub>1</sub></b>  | 18.28       | 17.58        | 16.85            | 17.25        | 16.71           | 16.67           | 17.11           | 16.99           |
| <b>32TS<sub>2</sub></b>  | 36.72       | 35.19        | 33.44            | 34.48        | 33.19           | 33.01           | 33.55           | 33.24           |
| <b>RMSD</b>              | <b>6.39</b> | <b>4.69</b>  | <b>2.73</b>      | <b>2.21</b>  | <b>2.68</b>     | <b>1.85</b>     | <b>2.83</b>     | <b>2.13</b>     |
| <b>MUE</b>               | <b>4.39</b> | <b>3.25</b>  | <b>1.92</b>      | <b>1.64</b>  | <b>1.85</b>     | <b>1.33</b>     | <b>2.02</b>     | <b>1.54</b>     |

**Table S15.** Relative energies for the different minima and TSs involved in the topology interconversions of several expanded porphyrins computed with several DFT approaches together with def2-TZVP basis set. The statistical errors (in kcal mol<sup>-1</sup>) are computed with respect canonical CCSD(T) data.<sup>[a]</sup>

| system                   | revDSD-<br>PBEB95-D3 | revDOD-<br>PBEB95-D3 | DSD-SCAN <sub>66</sub> -<br>D3 | DOD-SCAN <sub>66</sub> -<br>D3 | DSD-SCAN <sub>69</sub> -<br>D3 | DOD-SCAN <sub>69</sub> -<br>D3 |
|--------------------------|----------------------|----------------------|--------------------------------|--------------------------------|--------------------------------|--------------------------------|
| <b>24H<sub>a</sub></b>   | 7.13                 | 7.33                 | 12.37                          | 12.72                          | 11.98                          | 12.61                          |
| <b>24H<sub>b</sub></b>   | 0.00                 | 0.00                 | 0.00                           | 0.00                           | 0.00                           | 0.00                           |
| <b>24M</b>               | 5.32                 | 5.85                 | 5.12                           | 5.28                           | 5.13                           | 5.44                           |
| <b>24TS<sub>1</sub></b>  | 8.92                 | 8.95                 | 12.33                          | 12.54                          | 12.04                          | 12.41                          |
| <b>24TS<sub>2</sub></b>  | 4.89                 | 5.09                 | 5.29                           | 5.37                           | 5.25                           | 5.40                           |
| <b>28F</b>               | 0.64                 | 0.74                 | -2.49                          | -2.65                          | -2.37                          | -2.64                          |
| <b>28M<sub>1A</sub></b>  | -5.71                | -3.72                | -9.35                          | -8.86                          | -9.63                          | -8.61                          |
| <b>28M</b>               | -4.72                | -2.50                | -10.48                         | -10.10                         | -10.50                         | -9.71                          |
| <b>28M<sub>1B</sub></b>  | -2.95                | -0.75                | -7.18                          | -6.68                          | -7.46                          | -6.42                          |
| <b>28H</b>               | 0.00                 | 0.00                 | 0.00                           | 0.00                           | 0.00                           | 0.00                           |
| <b>28TS<sub>1A</sub></b> | 6.56                 | 6.58                 | 5.87                           | 5.82                           | 5.91                           | 5.83                           |
| <b>28TS<sub>1B</sub></b> | 3.37                 | 3.37                 | 2.85                           | 2.82                           | 2.81                           | 2.75                           |
| <b>28TS<sub>2A</sub></b> | 1.35                 | 3.77                 | -4.94                          | -4.47                          | -5.15                          | -4.14                          |
| <b>28TS<sub>2B</sub></b> | 4.62                 | 6.93                 | -1.67                          | -1.24                          | -1.74                          | -0.83                          |
| <b>28TS<sub>3</sub></b>  | 6.17                 | 6.18                 | 2.94                           | 2.75                           | 3.13                           | 2.80                           |
| <b>32F</b>               | 0.00                 | 0.00                 | 0.00                           | 0.00                           | 0.00                           | 0.00                           |
| <b>32H</b>               | 32.99                | 32.60                | 51.45                          | 52.42                          | 50.06                          | 51.70                          |
| <b>32M<sub>a</sub></b>   | 10.38                | 12.10                | 18.89                          | 19.97                          | 18.16                          | 20.12                          |
| <b>32M<sub>b</sub></b>   | 9.83                 | 11.99                | 19.53                          | 20.86                          | 18.19                          | 20.65                          |
| <b>32TS<sub>1</sub></b>  | 16.97                | 16.77                | 24.49                          | 24.88                          | 23.93                          | 24.57                          |
| <b>32TS<sub>2</sub></b>  | 33.28                | 32.74                | 50.71                          | 51.57                          | 49.39                          | 50.84                          |
| <b>RMSD</b>              | <b>2.99</b>          | <b>1.86</b>          | <b>7.88</b>                    | <b>8.05</b>                    | <b>7.55</b>                    | <b>7.77</b>                    |
| <b>MUE</b>               | <b>2.09</b>          | <b>1.28</b>          | <b>5.53</b>                    | <b>5.68</b>                    | <b>5.26</b>                    | <b>5.49</b>                    |



**Table S16.** D3BJ parameters and RMSD (in kcal mol<sup>-1</sup>) for selected functionals with and without DFT-D3BJ atom-pairwise dispersion correction.

|                  | BLYP        | PBE         | TPSS        | SCAN            |             |
|------------------|-------------|-------------|-------------|-----------------|-------------|
| RMSD (no D3BJ)   | 8.25        | 6.38        | 6.01        | 4.95            |             |
| RMSD (with D3BJ) | 4.49        | 4.97        | 4.76        | 4.64            |             |
| Improvement RMSD | <b>3.76</b> | <b>1.40</b> | <b>1.25</b> | <b>0.31</b>     |             |
| $s_6$            | 1.0000      | 1.0000      | 1.0000      | 1.00            |             |
| $s_8$            | 2.6996      | 0.7875      | 1.9435      | 0.00            |             |
| $a_1$            | 0.4298      | 0.4289      | 0.4535      | 0.54            |             |
| $a_2$            | 4.2359      | 4.4407      | 4.4752      | 5.42            |             |
|                  | B3LYP       | PBE0        | TPSSh       | SCAN0           | PW6B95      |
| RMSD (no D3BJ)   | 5.35        | 4.86        | 5.41        | 3.38            | 3.85        |
| RMSD (with D3BJ) | 3.01        | 3.11        | 3.97        | 2.72            | 2.51        |
| Improvement RMSD | <b>2.34</b> | <b>1.76</b> | <b>1.45</b> | <b>0.66</b>     | <b>1.34</b> |
| $s_6$            | 1.0000      | 1.0000      | 1.0000      | 1.0000          | 0.0000      |
| $s_8$            | 1.9889      | 1.2177      | 2.2382      | 0.0000          | 0.7257      |
| $a_1$            | 0.3981      | 0.4145      | 0.4529      | 0.0000          | 0.2076      |
| $a_2$            | 4.4211      | 4.8593      | 4.6550      | 7.9042          | 6.3750      |
|                  | BHLYP       | PWPB95      | CAM-B3LYP   | M06-2X, GRID4   | DSD-PBEP86  |
| RMSD (no D3BJ)   | 5.11        | 2.63        | 4.02        | 1.67            | 6.39        |
| RMSD (with D3BJ) | 2.67        | 1.85        | 1.78        | 1.32            | 4.68        |
| Improvement RMSD | <b>2.44</b> | <b>0.78</b> | <b>2.24</b> | <b>0.35</b>     | <b>1.70</b> |
| $s_6$            | 1.0000      | 0.8200      | 1.0000      | 1.00            | 0.418       |
| $s_8$            | 1.0354      | 0.2904      | 2.0674      | 0.00            | 0.000       |
| $a_1$            | 0.2793      | 0.0000      | 0.3708      | $s_{r,6}=1.619$ | 0.000       |
| $a_2$            | 4.9615      | 7.3141      | 5.4743      | using D3(0)     | 5.650       |

<sup>[a]</sup> All D3BJ parameters taken from Table S3 in Goerigk, L.; Hansen, A.; Bauer, C.; Ehrlich, S.; Najibi, A.; Grimme, S., A look at the density functional theory zoo with the advanced GMTKN55 database for general main group thermochemistry, kinetics and noncovalent interactions. *Phys. Chem. Chem. Phys.* **2017**, *19*, 32184-32215, except for SCAN-D3BJ (Brandenburg, J. G.; Bates, J. E.; Sun, J.; Perdew, J. P. Benchmark tests of a strongly constrained semilocal functional with a long-range dispersion correction. *Phys. Rev. B - Condens. Matter Mater. Phys.* **2016**, *94*, 17–19) and SCAN0-D3BJ (Table 1 of Santra, G.; Sylvetsky, N.; Martin, J. M. L. Minimally empirical double-hybrid functionals trained against the GMTKN55 database: RevDSD-PBEP86-D4, RevDOD-PBE-D4, and DOD-SCAN-D4. *J. Phys. Chem. A* **2019**, *123*, 5129–5143).

## VIII. Cartesian coordinates of B3LYP/6-311G(d,p) optimized geometries

### [24]pentaphyrin

#### 24H<sub>a</sub>

|   |          |          |          |
|---|----------|----------|----------|
| N | -2.3974  | -1.69516 | 0.17754  |
| N | -2.85222 | 1.05377  | -0.22313 |
| N | 0.55579  | 2.24403  | 0.02974  |
| N | 3.3491   | -0.37177 | -0.14791 |
| N | 1.71473  | -3.39258 | -0.11812 |
| C | -1.95446 | -2.99437 | 0.36053  |
| C | -3.08718 | -3.90403 | 0.46301  |
| C | -4.20026 | -3.14635 | 0.31355  |
| C | -3.73335 | -1.77608 | 0.12567  |
| C | -4.59162 | -0.67057 | -0.13088 |
| C | -4.16415 | 0.61814  | -0.30506 |
| C | -4.97456 | 1.78974  | -0.55751 |
| C | -4.15886 | 2.86726  | -0.58408 |
| C | -2.79026 | 2.43315  | -0.34356 |
| C | -1.76293 | 3.32265  | -0.21087 |
| C | -0.36957 | 3.27619  | 0.11011  |
| C | 0.32064  | 4.4075   | 0.56063  |
| C | 1.65763  | 4.06432  | 0.72491  |
| C | 1.81913  | 2.71972  | 0.3705   |
| C | 3.1219   | 2.1381   | 0.30099  |
| C | 3.75823  | 0.95808  | 0.05897  |
| C | 5.21589  | 0.92958  | -0.09491 |
| C | 5.63812  | -0.31975 | -0.39912 |
| C | 4.48247  | -1.17303 | -0.41481 |
| C | 4.14187  | -2.50688 | -0.50953 |
| C | 2.74554  | -2.52582 | -0.26178 |
| C | 2.25023  | -1.22095 | -0.03242 |
| C | 0.87186  | -1.30996 | 0.23591  |
| C | 0.54459  | -2.68039 | 0.16993  |
| C | -0.6515  | -3.41865 | 0.34172  |
| H | -3.01856 | -4.97251 | 0.61181  |
| H | -5.23346 | -3.46294 | 0.31129  |
| H | -6.04634 | 1.76477  | -0.68296 |
| H | -4.4335  | 3.90031  | -0.73713 |
| H | -0.13912 | 5.36529  | 0.7478   |
| H | 2.45964  | 4.70425  | 1.05945  |
| H | 5.8234   | 1.81803  | -0.00623 |
| H | 6.64959  | -0.64508 | -0.58611 |
| H | 0.16674  | -0.55289 | 0.53126  |
| H | -2.12306 | 0.37689  | -0.01584 |
| H | 0.38848  | 1.36307  | -0.43083 |

|   |          |          |          |
|---|----------|----------|----------|
| H | 1.7465   | -4.3842  | -0.28499 |
| H | -5.6561  | -0.85614 | -0.19733 |
| H | -0.51685 | -4.49502 | 0.42177  |
| H | 4.81171  | -3.33006 | -0.69341 |
| H | 3.85396  | 2.92224  | 0.46637  |
| H | -2.09924 | 4.35045  | -0.29338 |

## 24H<sub>b</sub>

|   |          |          |          |
|---|----------|----------|----------|
| N | 2.11631  | 3.05588  | 0.07431  |
| N | 3.4877   | -0.09248 | -0.09436 |
| N | 0.44333  | -3.14709 | -0.24578 |
| N | -3.05301 | -1.05898 | 0.00959  |
| N | -2.22391 | 1.65492  | 0.018    |
| C | 0.86066  | 2.42839  | 0.0598   |
| C | 1.06967  | 1.0361   | -0.01667 |
| C | 2.45866  | 0.84738  | -0.03985 |
| C | 3.09141  | 2.11181  | -0.00131 |
| C | 4.50231  | 1.97058  | -0.08305 |
| C | 4.70728  | 0.60367  | -0.16357 |
| H | 2.25422  | 4.0519   | 0.10101  |
| C | 5.74184  | -0.36839 | -0.40817 |
| H | 0.48783  | -3.62662 | -1.13078 |
| C | 5.15639  | -1.58792 | -0.51198 |
| H | -2.22979 | -0.47203 | 0.11203  |
| C | 3.71568  | -1.46988 | -0.28551 |
| H | 0.27471  | 0.31682  | -0.0655  |
| C | 2.8387   | -2.50146 | -0.20566 |
| H | 6.79294  | -0.14051 | -0.49867 |
| C | 1.49355  | -2.42986 | 0.30091  |
| H | 5.64634  | -2.53621 | -0.67495 |
| C | 0.97587  | -1.70943 | 1.36995  |
| H | 1.55494  | -1.08598 | 2.0312   |
| C | -0.41151 | -1.9469  | 1.4216   |
| H | -1.11452 | -1.54443 | 2.13311  |
| C | -0.73722 | -2.82071 | 0.3888   |
| H | -4.85166 | -3.75181 | -0.62381 |
| C | -2.03597 | -3.28394 | -0.05103 |
| H | -6.25135 | -1.4746  | -0.6631  |
| C | -3.09671 | -2.43668 | -0.15332 |
| H | -4.85336 | 3.71844  | -0.12531 |
| C | -4.48524 | -2.74974 | -0.45774 |
| H | -2.49498 | 5.00689  | 0.07818  |
| C | -5.19579 | -1.59593 | -0.47048 |
| C | -4.28646 | -0.49335 | -0.20733 |
| C | -4.53996 | 0.85317  | -0.21156 |
| C | -3.54578 | 1.87001  | -0.07671 |

|   |          |          |          |
|---|----------|----------|----------|
| C | -3.86096 | 3.2952   | -0.06202 |
| C | -2.67525 | 3.94145  | 0.04248  |
| C | -1.64314 | 2.91218  | 0.07691  |
| C | -0.30363 | 3.23178  | 0.10324  |
| H | 3.21677  | -3.47281 | -0.51281 |
| H | 5.26067  | 2.73542  | -0.11177 |
| H | -0.10679 | 4.30129  | 0.14336  |
| H | -5.56414 | 1.17049  | -0.36236 |
| H | -2.18108 | -4.32721 | -0.30863 |

## 24M

|   |          |          |          |
|---|----------|----------|----------|
| N | -2.42991 | 1.34997  | 0.44046  |
| N | -2.81643 | -1.21307 | -0.15898 |
| N | 1.08938  | -2.26765 | -0.16485 |
| N | 3.33229  | 0.05248  | -0.32282 |
| N | 1.58297  | 3.01661  | -0.57485 |
| C | -1.97166 | 2.63529  | 0.52834  |
| C | -3.09224 | 3.55298  | 0.70696  |
| C | -4.21938 | 2.79765  | 0.67199  |
| C | -3.78206 | 1.42284  | 0.46295  |
| C | -4.63344 | 0.34515  | 0.1127   |
| C | -4.1366  | -0.88108 | -0.30013 |
| C | -4.72956 | -1.91969 | -1.11086 |
| C | -3.73086 | -2.75227 | -1.53251 |
| C | -2.49393 | -2.31475 | -0.92564 |
| C | -1.2109  | -2.80132 | -0.98864 |
| C | -0.25753 | -2.46624 | 0.02944  |
| C | -0.45693 | -2.47243 | 1.42305  |
| C | 0.78828  | -2.35176 | 2.043    |
| C | 1.75414  | -2.18767 | 1.0433   |
| C | 3.16311  | -1.95749 | 1.13051  |
| C | 3.86627  | -1.05343 | 0.38889  |
| C | 5.29367  | -0.98901 | 0.18673  |
| C | 5.60016  | 0.10223  | -0.58215 |
| C | 4.39307  | 0.81076  | -0.85002 |
| C | 3.96823  | 2.10976  | -1.14915 |
| C | 2.63084  | 2.15744  | -0.72719 |
| C | 2.22147  | 0.89953  | -0.2086  |
| C | 0.89748  | 0.98909  | 0.2198   |
| C | 0.49801  | 2.33728  | -0.00199 |
| C | -0.6742  | 3.06314  | 0.29243  |
| H | -3.01191 | 4.62605  | 0.81113  |
| H | -5.24671 | 3.12656  | 0.73841  |
| H | -5.77696 | -1.97439 | -1.36793 |
| H | -3.82704 | -3.62047 | -2.16727 |
| H | -1.4147  | -2.61288 | 1.89711  |

|   |          |          |          |
|---|----------|----------|----------|
| H | 0.99162  | -2.33885 | 3.10264  |
| H | 5.97581  | -1.74286 | 0.55029  |
| H | 6.5831   | 0.41043  | -0.90523 |
| H | 0.27823  | 0.24749  | 0.69418  |
| H | -2.16625 | -0.47347 | 0.13244  |
| H | 1.53769  | -2.17587 | -1.06248 |
| H | 1.53274  | 3.95825  | -0.92444 |
| H | -5.69468 | 0.53533  | 0.0165   |
| H | -0.55856 | 4.14401  | 0.24916  |
| H | 4.58541  | 2.90351  | -1.53749 |
| H | 3.726    | -2.55093 | 1.8431   |
| H | -0.93458 | -3.48624 | -1.78227 |

**24TS<sub>1</sub>**

|   |          |          |          |
|---|----------|----------|----------|
| C | 2.66262  | 2.38542  | -0.52885 |
| C | 2.21466  | 1.09563  | -0.14799 |
| C | 0.87697  | 1.18281  | 0.25813  |
| C | 0.5214   | 2.54753  | 0.15164  |
| C | -0.65185 | 3.27525  | 0.45836  |
| C | -1.94898 | 2.83976  | 0.59536  |
| N | -2.39399 | 1.55123  | 0.37694  |
| C | -3.73232 | 1.62403  | 0.36441  |
| C | -4.57642 | 0.54567  | -0.03709 |
| C | -4.10282 | -0.68663 | -0.39803 |
| C | -4.81013 | -1.77698 | -1.04781 |
| C | -3.92133 | -2.75745 | -1.32194 |
| C | -2.61855 | -2.36947 | -0.7817  |
| C | -1.51743 | -3.15629 | -0.71736 |
| C | -0.34033 | -2.97489 | 0.14156  |
| C | -0.04408 | -3.73256 | 1.26706  |
| C | 1.27347  | -3.43777 | 1.65506  |
| C | 1.77801  | -2.47662 | 0.78203  |
| C | 3.14531  | -2.05937 | 0.70629  |
| C | 3.79134  | -0.99222 | 0.16843  |
| C | 5.23088  | -0.94943 | -0.05089 |
| C | 5.58121  | 0.22903  | -0.63001 |
| C | 4.39601  | 1.02774  | -0.74832 |
| C | 4.01849  | 2.35163  | -0.92327 |
| N | 1.63804  | 3.25189  | -0.31863 |
| N | 3.30802  | 0.24368  | -0.31574 |
| N | 0.76005  | -2.18294 | -0.11603 |
| N | -2.79603 | -1.10277 | -0.25485 |
| C | -4.19683 | 2.97597  | 0.65476  |
| C | -3.08057 | 3.73363  | 0.79887  |
| H | 1.62519  | 4.22646  | -0.56783 |
| H | 0.86744  | -1.61096 | -0.93929 |

|   |          |          |          |
|---|----------|----------|----------|
| H | -2.09189 | -0.43852 | 0.0582   |
| H | 0.2288   | 0.42053  | 0.65305  |
| H | 6.57054  | 0.54315  | -0.92515 |
| H | 5.87971  | -1.78227 | 0.17667  |
| H | 1.82532  | -3.86747 | 2.47729  |
| H | -0.72019 | -4.4382  | 1.72334  |
| H | -4.10949 | -3.70704 | -1.80021 |
| H | -5.86613 | -1.76074 | -1.27286 |
| H | -5.23008 | 3.28847  | 0.70541  |
| H | -3.01289 | 4.79431  | 0.99613  |
| H | 3.82166  | -2.7891  | 1.14069  |
| H | 4.65969  | 3.1642   | -1.22212 |
| H | -0.51779 | 4.35251  | 0.52974  |
| H | -5.63575 | 0.73752  | -0.15048 |
| H | -1.59925 | -4.12686 | -1.19668 |

## 24TS<sub>2</sub>

|   |          |          |          |
|---|----------|----------|----------|
| C | 2.77253  | 2.1848   | -0.54172 |
| C | 2.30684  | 0.90219  | -0.16409 |
| C | 0.94889  | 0.99102  | 0.16935  |
| C | 0.59595  | 2.3556   | 0.02439  |
| C | -0.5856  | 3.10192  | 0.25821  |
| C | -1.90123 | 2.7159   | 0.40437  |
| N | -2.40777 | 1.44175  | 0.30666  |
| C | -3.74997 | 1.56987  | 0.28765  |
| C | -4.64805 | 0.5086   | -0.00617 |
| C | -4.21394 | -0.76894 | -0.2968  |
| C | -4.89926 | -1.87522 | -0.93577 |
| C | -3.97913 | -2.83582 | -1.22505 |
| C | -2.69286 | -2.40434 | -0.71152 |
| C | -1.47719 | -3.02461 | -0.7139  |
| C | -0.40715 | -2.58606 | 0.14965  |
| C | -0.46275 | -2.22059 | 1.49649  |
| C | 0.85804  | -2.05335 | 1.95979  |
| C | 1.713    | -2.26739 | 0.88948  |
| C | 3.16733  | -2.19571 | 0.77912  |
| C | 3.86821  | -1.2005  | 0.19484  |
| C | 5.31266  | -1.19236 | -0.04126 |
| C | 5.68004  | -0.00404 | -0.58569 |
| C | 4.50933  | 0.81769  | -0.69882 |
| C | 4.14082  | 2.14125  | -0.88959 |
| N | -2.91469 | -1.16674 | -0.1337  |
| N | 0.9278   | -2.59854 | -0.19373 |
| N | 3.41014  | 0.04853  | -0.27817 |
| N | 1.73481  | 3.05348  | -0.40113 |
| C | -2.99384 | 3.6781   | 0.52589  |

|   |          |          |          |
|---|----------|----------|----------|
| C | -4.14443 | 2.96622  | 0.4533   |
| H | -2.87583 | 4.74825  | 0.62454  |
| H | -5.16113 | 3.3319   | 0.47869  |
| H | -5.95373 | -1.88663 | -1.16814 |
| H | -4.15112 | -3.78377 | -1.71283 |
| H | -1.37184 | -2.12893 | 2.06855  |
| H | 1.17003  | -1.77287 | 2.95348  |
| H | 5.94518  | -2.03929 | 0.17722  |
| H | 6.67616  | 0.30096  | -0.86936 |
| H | 0.28113  | 0.2245   | 0.52128  |
| H | -2.20944 | -0.46093 | 0.09462  |
| H | 1.28605  | -2.7791  | -1.1177  |
| H | 1.73556  | 4.02552  | -0.65935 |
| H | -5.69972 | 0.73772  | -0.11895 |
| H | -0.43612 | 4.17968  | 0.26129  |
| H | 4.79004  | 2.94702  | -1.1911  |
| H | 3.75197  | -3.01173 | 1.19483  |
| H | -1.33869 | -3.90679 | -1.32937 |

### [28]hexaphyrin

#### 28H

|   |          |          |          |
|---|----------|----------|----------|
| C | 1.17129  | 2.92911  | 0.12886  |
| C | 0.69215  | 1.63073  | 0.56406  |
| C | -0.66747 | 1.63671  | 0.55523  |
| C | -1.12919 | 2.93656  | 0.11235  |
| C | -2.38728 | 3.43672  | -0.08156 |
| C | -3.64434 | 2.75413  | -0.03976 |
| N | -3.85103 | 1.43578  | 0.02407  |
| C | -5.23505 | 1.27593  | 0.01588  |
| C | -5.89161 | 0.06713  | 0.01648  |
| C | -5.31116 | -1.21836 | 0.01186  |
| C | -5.94198 | -2.47336 | 0.04797  |
| C | -4.94605 | -3.44578 | 0.06421  |
| C | -3.6955  | -2.79302 | 0.02681  |
| C | -2.42612 | -3.43998 | 0.05488  |
| C | -1.17129 | -2.92911 | -0.12885 |
| C | -0.69215 | -1.63073 | -0.56406 |
| C | 0.66747  | -1.63671 | -0.55523 |
| C | 1.12919  | -2.93656 | -0.11234 |
| C | 2.38728  | -3.43672 | 0.08156  |
| C | 3.64434  | -2.75413 | 0.03976  |
| N | 3.85103  | -1.43578 | -0.02407 |
| C | 5.23505  | -1.27593 | -0.01588 |
| C | 5.89161  | -0.06713 | -0.01648 |
| C | 5.31116  | 1.21836  | -0.01186 |
| C | 5.94198  | 2.47336  | -0.04797 |
| C | 4.94605  | 3.44578  | -0.06421 |

|   |          |          |          |
|---|----------|----------|----------|
| C | 3.6955   | 2.79302  | -0.02681 |
| C | 2.42612  | 3.43999  | -0.05488 |
| N | 0.02236  | 3.68768  | -0.07426 |
| C | -4.90367 | 3.49257  | -0.09283 |
| C | -5.8932  | 2.56641  | -0.04575 |
| N | -3.94892 | -1.44766 | -0.00937 |
| N | -0.02236 | -3.68767 | 0.07426  |
| C | 4.90367  | -3.49257 | 0.09283  |
| C | 5.8932   | -2.56641 | 0.04574  |
| N | 3.94892  | 1.44766  | 0.00937  |
| H | 0.02761  | 4.57886  | -0.54208 |
| H | 1.32267  | 0.82351  | 0.90185  |
| H | -1.33567 | 0.85182  | 0.86532  |
| H | -2.45507 | 4.49673  | -0.31044 |
| H | -4.99566 | 4.56805  | -0.14846 |
| H | -6.96216 | 2.72404  | -0.0625  |
| H | -6.97593 | 0.09143  | 0.01288  |
| H | -3.30494 | -0.66313 | 0.01841  |
| H | -7.01006 | -2.6267  | 0.06486  |
| H | -5.07475 | -4.51684 | 0.0891   |
| H | -2.48746 | -4.50167 | 0.27469  |
| H | -0.02761 | -4.57886 | 0.54208  |
| H | -1.32267 | -0.82351 | -0.90185 |
| H | 1.33567  | -0.85182 | -0.86532 |
| H | 2.45507  | -4.49673 | 0.31045  |
| H | 4.99567  | -4.56805 | 0.14846  |
| H | 6.96216  | -2.72404 | 0.0625   |
| H | 6.97593  | -0.09143 | -0.01289 |
| H | 3.30494  | 0.66313  | -0.0184  |
| H | 7.01006  | 2.6267   | -0.06486 |
| H | 5.07475  | 4.51684  | -0.08911 |
| H | 2.48745  | 4.50167  | -0.27469 |

## 28M

|   |          |         |          |
|---|----------|---------|----------|
| C | 5.27508  | 0.2316  | -0.26339 |
| C | 6.18464  | 1.23384 | -0.74045 |
| C | 5.44242  | 2.26055 | -1.2699  |
| C | 4.04996  | 1.92453 | -1.14038 |
| C | 2.93774  | 2.74541 | -1.30314 |
| C | 1.61577  | 2.36996 | -1.00704 |
| C | 0.99602  | 1.09193 | -0.95981 |
| C | -0.2988  | 1.24394 | -0.50907 |
| C | -0.52769 | 2.62399 | -0.24614 |
| C | -1.5934  | 3.30513 | 0.35219  |
| C | -2.80837 | 2.79701 | 0.80199  |
| C | -3.8345  | 3.53055 | 1.48572  |



|   |          |          |          |
|---|----------|----------|----------|
| C | -4.89736 | 2.69211  | 1.70589  |
| C | -4.57413 | 1.41428  | 1.14925  |
| C | -5.39356 | 0.31046  | 0.93396  |
| C | -5.01514 | -0.80729 | 0.17015  |
| N | -3.73108 | -1.07666 | -0.19132 |
| C | -3.80146 | -2.03421 | -1.16656 |
| C | -2.67617 | -2.55596 | -1.80811 |
| C | -1.36861 | -2.46572 | -1.32422 |
| C | -0.13626 | -2.73216 | -1.98924 |
| C | 0.88994  | -2.54336 | -1.09388 |
| C | 0.32053  | -2.21816 | 0.17834  |
| C | 0.94367  | -2.21354 | 1.43408  |
| C | 2.32113  | -2.06117 | 1.61885  |
| N | 3.1305   | -1.4704  | 0.69744  |
| C | 4.40006  | -1.55855 | 1.1714   |
| C | 5.47348  | -0.84522 | 0.59995  |
| N | 4.01552  | 0.66137  | -0.60976 |
| N | 0.63954  | 3.2735   | -0.62431 |
| N | -3.28685 | 1.51535  | 0.66241  |
| C | -5.93679 | -1.67733 | -0.54215 |
| C | -5.18348 | -2.39918 | -1.41715 |
| N | -1.04154 | -2.14797 | -0.02234 |
| C | 3.11161  | -2.54006 | 2.74327  |
| C | 4.41399  | -2.28467 | 2.43395  |
| H | 7.25869  | 1.18646  | -0.64325 |
| H | 5.80995  | 3.18881  | -1.68096 |
| H | 1.44625  | 0.16271  | -1.26577 |
| H | -1.00618 | 0.44252  | -0.38328 |
| H | -3.75245 | 4.57146  | 1.76043  |
| H | -5.83474 | 2.93126  | 2.18444  |
| H | -7.01173 | -1.6807  | -0.42975 |
| H | -5.51906 | -3.13039 | -2.13872 |
| H | -0.05571 | -3.03232 | -3.02303 |
| H | 1.94756  | -2.67192 | -1.25119 |
| H | 2.72468  | -3.04689 | 3.61598  |
| H | 5.29178  | -2.51477 | 3.02126  |
| H | 3.21754  | 0.12977  | -0.24794 |
| H | 0.83335  | 4.23759  | -0.40654 |
| H | -2.90666 | 0.73586  | 0.13066  |
| H | -1.74455 | -1.85304 | 0.64334  |
| H | 6.47966  | -1.03459 | 0.95272  |
| H | 3.13543  | 3.78613  | -1.53704 |
| H | -1.46316 | 4.37101  | 0.51155  |
| H | -6.42654 | 0.39312  | 1.24952  |
| H | -2.8157  | -3.08399 | -2.74429 |
| H | 0.32718  | -2.4066  | 2.30667  |

**28M<sub>1A</sub>**

|   |          |          |          |
|---|----------|----------|----------|
| N | -3.31081 | 1.48577  | 0.68381  |
| H | -2.91857 | 0.71418  | 0.14903  |
| C | -4.59238 | 1.35642  | 1.18029  |
| C | -4.93302 | 2.62187  | 1.75194  |
| H | -5.87079 | 2.84094  | 2.23929  |
| C | -3.88495 | 3.48076  | 1.5332   |
| H | -3.81872 | 4.52023  | 1.81725  |
| C | -2.85302 | 2.77162  | 0.83366  |
| C | -1.64793 | 3.30385  | 0.37761  |
| N | 0.58075  | 3.31078  | -0.60222 |
| H | 0.77159  | 4.26755  | -0.35149 |
| C | 1.56598  | 2.41836  | -0.99455 |
| C | 0.94889  | 1.1366   | -0.98772 |
| H | 1.42812  | 0.23387  | -1.32117 |
| C | -0.34636 | 1.27057  | -0.54419 |
| H | -1.05561 | 0.46606  | -0.45061 |
| C | -0.58163 | 2.64675  | -0.2409  |
| C | 2.88719  | 2.79242  | -1.26159 |
| N | 3.93079  | 0.70616  | -0.57987 |
| C | 3.99973  | 1.95513  | -1.10488 |
| C | 5.39285  | 2.36895  | -1.22897 |
| H | 5.73509  | 3.31494  | -1.62445 |
| C | 6.14301  | 1.35768  | -0.71347 |
| H | 7.21707  | 1.31764  | -0.60008 |
| C | 5.2024   | 0.33757  | -0.26971 |
| C | 5.48415  | -0.74834 | 0.57764  |
| N | 3.17135  | -1.46575 | 0.75297  |
| H | 2.91076  | -0.69518 | 0.12654  |
| C | 4.48502  | -1.53619 | 1.15477  |
| C | 4.50588  | -2.37362 | 2.31506  |
| H | 5.39753  | -2.66132 | 2.85152  |
| C | 3.20454  | -2.69491 | 2.63239  |
| H | 2.86511  | -3.31393 | 3.44916  |
| C | 2.35164  | -2.13737 | 1.62646  |
| C | 0.97423  | -2.27344 | 1.4312   |
| N | -0.99756 | -2.13376 | -0.03901 |
| H | -1.70536 | -1.86104 | 0.63094  |
| C | -1.31812 | -2.42015 | -1.35291 |
| C | -0.08003 | -2.66306 | -2.01634 |
| H | 0.00977  | -2.93539 | -3.05697 |
| C | 0.93926  | -2.49938 | -1.10998 |
| H | 1.99385  | -2.64322 | -1.27894 |
| C | 0.36102  | -2.21701 | 0.17169  |
| C | -2.61844 | -2.51217 | -1.84656 |
| N | -3.70385 | -1.0969  | -0.19521 |

|   |          |          |          |
|---|----------|----------|----------|
| C | -3.75752 | -2.03201 | -1.19039 |
| C | -5.13063 | -2.42054 | -1.44611 |
| H | -5.45294 | -3.14224 | -2.18313 |
| C | -5.89761 | -1.73338 | -0.55323 |
| H | -6.97211 | -1.7613  | -0.44007 |
| C | -4.9939  | -0.86072 | 0.17521  |
| C | -5.39101 | 0.23889  | 0.9552   |
| H | -1.52955 | 4.36852  | 0.55321  |
| H | 3.08722  | 3.84262  | -1.45379 |
| H | 6.50487  | -0.90012 | 0.90625  |
| H | 0.36126  | -2.51752 | 2.29176  |
| H | -2.7447  | -3.00728 | -2.80238 |
| H | -6.42416 | 0.29692  | 1.27594  |

### 28M<sub>1B</sub>

|   |          |          |          |
|---|----------|----------|----------|
| C | -5.11517 | -0.79915 | 0.19826  |
| N | -3.82756 | -1.08437 | -0.20819 |
| C | -3.83307 | -2.11647 | -1.12828 |
| C | -5.1879  | -2.55089 | -1.2419  |
| C | -5.95992 | -1.78029 | -0.40076 |
| C | -2.68943 | -2.58818 | -1.77547 |
| C | -1.37725 | -2.4445  | -1.31846 |
| N | -1.01305 | -2.18427 | -0.00847 |
| C | 0.36318  | -2.22825 | 0.14477  |
| C | 0.89293  | -2.43377 | -1.16737 |
| C | -0.1566  | -2.60421 | -2.03763 |
| C | 1.0222   | -2.30165 | 1.3742   |
| C | 2.40771  | -2.15154 | 1.53312  |
| N | 3.18661  | -1.48659 | 0.64067  |
| C | 4.47163  | -1.6006  | 1.07539  |
| C | 4.52132  | -2.41785 | 2.27737  |
| C | 3.22767  | -2.7083  | 2.59702  |
| C | 5.52595  | -0.84279 | 0.53022  |
| C | 5.30676  | 0.2823   | -0.2651  |
| N | 4.03719  | 0.72572  | -0.55563 |
| C | 4.05558  | 2.004    | -1.04391 |
| C | 5.44198  | 2.35091  | -1.19089 |
| C | 6.20058  | 1.3057   | -0.71976 |
| C | 2.93292  | 2.82274  | -1.17268 |
| C | 1.61721  | 2.43539  | -0.88439 |
| N | 0.62153  | 3.32879  | -0.53536 |
| C | -0.54515 | 2.66606  | -0.17481 |
| C | -0.28764 | 1.28323  | -0.40342 |
| C | 1.013    | 1.14309  | -0.8241  |
| C | -1.64683 | 3.3212   | 0.36812  |
| C | -2.87727 | 2.77903  | 0.76581  |

|   |          |          |          |
|---|----------|----------|----------|
| N | -3.29783 | 1.49723  | 0.59866  |
| C | -4.58731 | 1.46059  | 1.04811  |
| C | -4.98679 | 2.75746  | 1.56971  |
| C | -3.92504 | 3.58293  | 1.38293  |
| C | -5.45136 | 0.36922  | 0.8794   |
| H | -5.9534  | 2.99425  | 1.99092  |
| H | -3.84614 | 4.63355  | 1.62491  |
| H | 0.7894   | 4.30433  | -0.34963 |
| H | 1.48447  | 0.21649  | -1.10307 |
| H | -1.00886 | 0.50255  | -0.24825 |
| H | 5.79703  | 3.29511  | -1.57564 |
| H | 7.27694  | 1.25746  | -0.65354 |
| H | 5.41463  | -2.68301 | 2.82511  |
| H | 2.86577  | -3.28292 | 3.4379   |
| H | -1.672   | -2.1134  | 0.75146  |
| H | -0.10163 | -2.81569 | -3.09472 |
| H | 1.94846  | -2.4944  | -1.37276 |
| H | -5.51344 | -3.37628 | -1.85691 |
| H | -7.0248  | -1.8545  | -0.23963 |
| H | -1.5474  | 4.39398  | 0.512    |
| H | 3.12371  | 3.86982  | -1.38273 |
| H | 6.54058  | -1.04947 | 0.84776  |
| H | 0.43425  | -2.55162 | 2.25253  |
| H | -2.82672 | -3.12455 | -2.70637 |
| H | -6.48362 | 0.48632  | 1.18657  |
| H | -3.13885 | -0.32929 | -0.13709 |
| H | 3.25004  | 0.17336  | -0.20348 |

## 28F

|   |             |             |             |
|---|-------------|-------------|-------------|
| N | 3.73912200  | 0.62468100  | -0.40325500 |
| C | 3.90976100  | 1.26413100  | -1.61573700 |
| C | 2.82619100  | 1.83225300  | -2.26099300 |
| C | 1.54898200  | 1.99695200  | -1.66880600 |
| C | 0.29448400  | 2.26731800  | -2.24979900 |
| C | -0.65783400 | 2.29809300  | -1.23246400 |
| C | 0.01295700  | 2.09588400  | -0.00245500 |
| C | -0.45763200 | 2.24770900  | 1.34916300  |
| C | -1.74986100 | 2.03203300  | 1.74660700  |
| C | -2.43317800 | 2.45753700  | 2.95848300  |
| C | -3.73912200 | 2.08946300  | 2.87113300  |
| C | -3.92940200 | 1.34620200  | 1.63716400  |
| C | -5.02965900 | 0.68313600  | 1.14694900  |
| C | -4.92868100 | -0.15673600 | -0.01854100 |
| N | -3.73912200 | -0.62468100 | -0.40325500 |
| C | -3.90976100 | -1.26413100 | -1.61573700 |
| C | -2.82619100 | -1.83225300 | -2.26099300 |

|   |             |             |             |
|---|-------------|-------------|-------------|
| C | -1.54898200 | -1.99695200 | -1.66880600 |
| C | -0.29448400 | -2.26731800 | -2.24979900 |
| C | 0.65783400  | -2.29809300 | -1.23246400 |
| C | -0.01295700 | -2.09588400 | -0.00245500 |
| C | 0.45763200  | -2.24770900 | 1.34916300  |
| C | 1.74986100  | -2.03203300 | 1.74660700  |
| C | 2.43317800  | -2.45753700 | 2.95848300  |
| C | 3.73912200  | -2.08946300 | 2.87113300  |
| C | 3.92940200  | -1.34620200 | 1.63716400  |
| C | 5.02965900  | -0.68313600 | 1.14694900  |
| C | 4.92868100  | 0.15673600  | -0.01854100 |
| C | 5.95070200  | 0.53686100  | -0.98115400 |
| C | 5.30581100  | 1.19620900  | -1.99261500 |
| N | 1.32909600  | 1.90300100  | -0.30496000 |
| N | -2.70530100 | 1.38656200  | 0.99471500  |
| C | -5.95070200 | -0.53686100 | -0.98115400 |
| C | -5.30581100 | -1.19620900 | -1.99261500 |
| N | -1.32909600 | -1.90300100 | -0.30496000 |
| N | 2.70530100  | -1.38656200 | 0.99471500  |
| H | 7.00232300  | 0.29620600  | -0.91813000 |
| H | 5.74159600  | 1.61222900  | -2.88987800 |
| H | 2.94142600  | 2.17768300  | -3.28258400 |
| H | 2.07113500  | 1.59612400  | 0.31597400  |
| H | 0.12073700  | 2.41492000  | -3.30485700 |
| H | -1.70981400 | 2.51057100  | -1.33232300 |
| H | 0.24349300  | 2.62352900  | 2.08518200  |
| H | -2.53395000 | 0.76155000  | 0.21248800  |
| H | -1.96397100 | 3.02275600  | 3.75000300  |
| H | -4.52086400 | 2.27973100  | 3.59134500  |
| H | -5.98228100 | 0.80656000  | 1.64567500  |
| H | -7.00232300 | -0.29620600 | -0.91813000 |
| H | -5.74159600 | -1.61222900 | -2.88987800 |
| H | -2.94142600 | -2.17768300 | -3.28258400 |
| H | -2.07113500 | -1.59612400 | 0.31597400  |
| H | -0.12073700 | -2.41492000 | -3.30485700 |
| H | 1.70981400  | -2.51057100 | -1.33232300 |
| H | -0.24349300 | -2.62352900 | 2.08518200  |
| H | 2.53395000  | -0.76155000 | 0.21248800  |
| H | 1.96397100  | -3.02275600 | 3.75000300  |
| H | 4.52086400  | -2.27973100 | 3.59134500  |
| H | 5.98228100  | -0.80656000 | 1.64567500  |

### 28TS<sub>1A</sub>

|   |          |         |         |
|---|----------|---------|---------|
| N | -3.73098 | 1.49538 | 0.45978 |
| H | -3.18934 | 0.69443 | 0.14187 |
| C | -5.06315 | 1.33018 | 0.74297 |

|   |          |          |          |
|---|----------|----------|----------|
| C | -5.57179 | 2.62891  | 1.11382  |
| H | -6.59366 | 2.82153  | 1.40224  |
| C | -4.5505  | 3.52374  | 1.0113   |
| H | -4.58425 | 4.58563  | 1.2048   |
| C | -3.36267 | 2.82372  | 0.58586  |
| C | -2.13401 | 3.39141  | 0.35229  |
| N | 0.22722  | 3.51508  | -0.20468 |
| H | 0.29539  | 4.50152  | -0.0125  |
| C | 1.30447  | 2.70626  | -0.49545 |
| C | 0.7989   | 1.39367  | -0.56458 |
| H | 1.38784  | 0.53603  | -0.8218  |
| C | -0.56271 | 1.42688  | -0.29086 |
| H | -1.21225 | 0.56595  | -0.2844  |
| C | -0.92682 | 2.769    | -0.03855 |
| C | 2.61294  | 3.2224   | -0.666   |
| N | 3.9186   | 1.16935  | -0.33656 |
| C | 3.79329  | 2.51281  | -0.61337 |
| C | 5.11627  | 3.13005  | -0.70808 |
| H | 5.30474  | 4.17225  | -0.92452 |
| C | 6.01525  | 2.15304  | -0.44827 |
| H | 7.09243  | 2.22852  | -0.40271 |
| C | 5.23691  | 0.93796  | -0.19328 |
| C | 5.78386  | -0.28082 | 0.26914  |
| N | 3.66792  | -1.4862  | 0.4013   |
| H | 3.15353  | -0.65726 | 0.10502  |
| C | 5.02045  | -1.38122 | 0.61704  |
| C | 5.41662  | -2.57398 | 1.32903  |
| H | 6.43193  | -2.79952 | 1.61796  |
| C | 4.29811  | -3.3073  | 1.584    |
| H | 4.2371   | -4.2553  | 2.0978   |
| C | 3.16529  | -2.64362 | 0.98085  |
| C | 1.88058  | -3.11033 | 0.89923  |
| N | -0.4576  | -3.05902 | 0.14591  |
| H | -0.8335  | -3.55761 | 0.93652  |
| C | -1.21129 | -2.64621 | -0.92457 |
| C | -0.35844 | -1.95253 | -1.77436 |
| H | -0.64574 | -1.51862 | -2.71872 |
| C | 0.92513  | -1.94577 | -1.19224 |
| H | 1.82603  | -1.54058 | -1.6238  |
| C | 0.8601   | -2.65219 | 0.01385  |
| C | -2.59478 | -3.11173 | -1.08824 |
| N | -3.85092 | -1.22381 | -0.12949 |
| C | -3.73151 | -2.4941  | -0.68293 |
| C | -5.06195 | -3.12634 | -0.7682  |
| H | -5.25351 | -4.11335 | -1.16456 |
| C | -5.93509 | -2.25186 | -0.23961 |
| H | -7.0037  | -2.3598  | -0.11668 |

|   |          |          |          |
|---|----------|----------|----------|
| C | -5.15468 | -1.05491 | 0.12605  |
| C | -5.74508 | 0.13401  | 0.6096   |
| H | -2.09544 | 4.46621  | 0.50176  |
| H | 2.70224  | 4.29886  | -0.78489 |
| H | 6.85052  | -0.33152 | 0.44629  |
| H | 1.64709  | -3.97195 | 1.51695  |
| H | -2.71313 | -4.08044 | -1.56959 |
| H | -6.80642 | 0.13286  | 0.82063  |

**28TS<sub>1B</sub>**

|   |          |          |          |
|---|----------|----------|----------|
| C | -5.23908 | -0.91392 | 0.1034   |
| N | -3.92025 | -1.22665 | -0.15908 |
| C | -3.81272 | -2.49219 | -0.71551 |
| C | -5.17636 | -3.01655 | -0.76324 |
| C | -6.01469 | -2.08885 | -0.25097 |
| C | -2.69449 | -3.13828 | -1.12794 |
| C | -1.30981 | -2.68358 | -0.9537  |
| N | -0.58646 | -3.04302 | 0.15395  |
| C | 0.73279  | -2.62991 | 0.04332  |
| C | 0.8295   | -1.97179 | -1.18978 |
| C | -0.43257 | -2.01208 | -1.80593 |
| C | 1.72309  | -3.03143 | 0.97825  |
| C | 3.02632  | -2.59835 | 1.04848  |
| N | 3.54963  | -1.51708 | 0.36428  |
| C | 4.86628  | -1.5162  | 0.62085  |
| C | 5.23828  | -2.63587 | 1.48163  |
| C | 4.08312  | -3.27978 | 1.78496  |
| C | 5.75533  | -0.48653 | 0.19824  |
| C | 5.33226  | 0.73879  | -0.26191 |
| N | 4.00807  | 1.10675  | -0.38083 |
| C | 3.89238  | 2.45765  | -0.63877 |
| C | 5.24708  | 2.94831  | -0.78949 |
| C | 6.10872  | 1.91979  | -0.5694  |
| C | 2.73796  | 3.20115  | -0.66451 |
| C | 1.41849  | 2.70647  | -0.48229 |
| N | 0.37318  | 3.52249  | -0.1245  |
| C | -0.80317 | 2.79691  | 0.01431  |
| C | -0.4797  | 1.46636  | -0.31611 |
| C | 0.87541  | 1.40865  | -0.61519 |
| C | -1.99592 | 3.41555  | 0.43815  |
| C | -3.24118 | 2.85651  | 0.63965  |
| N | -3.59577 | 1.53682  | 0.43667  |
| C | -4.90933 | 1.46916  | 0.69965  |
| C | -5.44274 | 2.76337  | 1.10877  |
| C | -4.39853 | 3.62826  | 1.06975  |
| C | -5.70439 | 0.29695  | 0.53975  |

|   |          |          |          |
|---|----------|----------|----------|
| H | -6.47053 | 2.96387  | 1.37576  |
| H | -4.39591 | 4.68487  | 1.29801  |
| H | 0.47321  | 4.49376  | 0.12303  |
| H | 1.40992  | 0.53751  | -0.94709 |
| H | -1.1854  | 0.65578  | -0.34284 |
| H | 5.49226  | 3.97374  | -1.02265 |
| H | 7.1877   | 1.94961  | -0.58431 |
| H | 6.23815  | -2.86048 | 1.82491  |
| H | 3.95046  | -4.15479 | 2.40569  |
| H | -0.97562 | -3.54439 | 0.9367   |
| H | -0.69831 | -1.61767 | -2.77399 |
| H | 1.75065  | -1.57405 | -1.58095 |
| H | -5.42339 | -3.99855 | -1.1379  |
| H | -7.08583 | -2.15925 | -0.13349 |
| H | -1.93122 | 4.4835   | 0.63353  |
| H | 2.86122  | 4.27255  | -0.7819  |
| H | 6.81877  | -0.63447 | 0.33737  |
| H | 1.44019  | -3.81944 | 1.67198  |
| H | -2.84041 | -4.09855 | -1.61413 |
| H | -6.76872 | 0.38279  | 0.72072  |
| H | -3.20576 | -0.5093  | -0.08804 |
| H | 3.28578  | 0.44631  | -0.10037 |

### 28TS<sub>2A</sub>

|   |          |         |          |
|---|----------|---------|----------|
| N | -3.34239 | 1.49443 | 0.62851  |
| H | -2.94455 | 0.71591 | 0.1085   |
| C | -4.63261 | 1.37551 | 1.10324  |
| C | -4.98402 | 2.65244 | 1.64091  |
| H | -5.9304  | 2.88152 | 2.10649  |
| C | -3.93079 | 3.50665 | 1.42556  |
| H | -3.86877 | 4.55102 | 1.69206  |
| C | -2.88547 | 2.78296 | 0.76309  |
| C | -1.6663  | 3.29982 | 0.32637  |
| N | 0.58344  | 3.25678 | -0.61482 |
| H | 0.77465  | 4.22588 | -0.41814 |
| C | 1.56228  | 2.34143 | -0.96607 |
| C | 0.94144  | 1.06641 | -0.90267 |
| H | 1.41373  | 0.14216 | -1.18276 |
| C | -0.35718 | 1.22791 | -0.47839 |
| H | -1.06977 | 0.43262 | -0.35192 |
| C | -0.58911 | 2.61633 | -0.24223 |
| C | 2.88143  | 2.69063 | -1.27211 |
| N | 3.98692  | 0.60899 | -0.57212 |
| C | 3.99308  | 1.85707 | -1.12912 |
| C | 5.36963  | 2.25708 | -1.3315  |
| H | 5.68045  | 3.19559 | -1.76748 |



|   |          |          |          |
|---|----------|----------|----------|
| C | 6.16514  | 1.26645  | -0.82892 |
| H | 7.24368  | 1.2464   | -0.77607 |
| C | 5.28406  | 0.25313  | -0.30595 |
| C | 5.55948  | -0.8062  | 0.56932  |
| N | 3.2162   | -1.31054 | 0.74389  |
| H | 3.23874  | -0.27501 | 0.00665  |
| C | 4.50401  | -1.4955  | 1.1815   |
| C | 4.47554  | -2.26479 | 2.39727  |
| H | 5.3418   | -2.58708 | 2.95629  |
| C | 3.15704  | -2.45581 | 2.71666  |
| H | 2.75647  | -2.99392 | 3.56357  |
| C | 2.36834  | -1.89511 | 1.64592  |
| C | 0.98916  | -2.03668 | 1.45715  |
| N | -0.99089 | -2.08015 | -0.0013  |
| H | -1.70371 | -1.78331 | 0.65319  |
| C | -1.30919 | -2.46535 | -1.28812 |
| C | -0.06748 | -2.72959 | -1.93971 |
| H | 0.02328  | -3.07337 | -2.95894 |
| C | 0.95113  | -2.47543 | -1.05418 |
| H | 2.01089  | -2.59041 | -1.2116  |
| C | 0.37154  | -2.10711 | 0.20401  |
| C | -2.61042 | -2.60671 | -1.76847 |
| N | -3.71484 | -1.11611 | -0.19275 |
| C | -3.75396 | -2.09974 | -1.14106 |
| C | -5.12291 | -2.51174 | -1.3864  |
| H | -5.43374 | -3.27153 | -2.08926 |
| C | -5.90153 | -1.78743 | -0.53504 |
| H | -6.97654 | -1.8184  | -0.42774 |
| C | -5.00975 | -0.87393 | 0.15817  |
| C | -5.42341 | 0.24875  | 0.89413  |
| H | -1.54794 | 4.36883  | 0.47268  |
| H | 3.0886   | 3.72807  | -1.51598 |
| H | 6.57926  | -0.99275 | 0.87915  |
| H | 0.37526  | -2.213   | 2.33465  |
| H | -2.73411 | -3.16221 | -2.6908  |
| H | -6.46156 | 0.31057  | 1.19749  |

### 28TS<sub>2B</sub>

|   |          |          |          |
|---|----------|----------|----------|
| C | -5.09649 | -0.83122 | 0.20487  |
| N | -3.79217 | -0.93905 | -0.22212 |
| C | -3.76844 | -1.85748 | -1.24931 |
| C | -5.10484 | -2.34925 | -1.45933 |
| C | -5.91221 | -1.7619  | -0.52279 |
| C | -2.61744 | -2.28556 | -1.91159 |
| C | -1.31924 | -2.24836 | -1.40057 |
| N | -0.99587 | -2.08725 | -0.0671  |

|   |          |          |          |
|---|----------|----------|----------|
| C | 0.36756  | -2.19064 | 0.12947  |
| C | 0.93665  | -2.38462 | -1.16776 |
| C | -0.08565 | -2.45419 | -2.08327 |
| C | 0.99373  | -2.29667 | 1.37713  |
| C | 2.37288  | -2.14649 | 1.56346  |
| N | 3.16544  | -1.48104 | 0.68093  |
| C | 4.44001  | -1.57929 | 1.13974  |
| C | 4.47442  | -2.38642 | 2.35134  |
| C | 3.17865  | -2.68861 | 2.6473   |
| C | 5.49634  | -0.81867 | 0.60125  |
| C | 5.27857  | 0.28782  | -0.21964 |
| N | 4.01313  | 0.70889  | -0.55784 |
| C | 4.03132  | 1.98827  | -1.05005 |
| C | 5.418    | 2.35214  | -1.15558 |
| C | 6.17368  | 1.32     | -0.65586 |
| C | 2.90614  | 2.79406  | -1.20782 |
| C | 1.58551  | 2.37981  | -0.96731 |
| N | 0.5824   | 3.23888  | -0.55857 |
| C | -0.57696 | 2.53828  | -0.24622 |
| C | -0.31663 | 1.18578  | -0.593   |
| C | 0.99104  | 1.08766  | -1.01832 |
| C | -1.66149 | 3.14749  | 0.38339  |
| C | -2.86526 | 2.60192  | 0.83383  |
| N | -3.36224 | 1.33312  | 0.67377  |
| C | -4.62315 | 1.31204  | 1.2255   |
| C | -4.9137  | 2.58915  | 1.81649  |
| C | -3.83751 | 3.38719  | 1.56359  |
| C | -5.48638 | 0.23053  | 1.02445  |
| H | -5.82901 | 2.84623  | 2.32852  |
| H | -3.70531 | 4.42479  | 1.83489  |
| H | 0.75394  | 4.18636  | -0.26282 |
| H | 1.47335  | 0.19533  | -1.3778  |
| H | -1.03344 | 0.38782  | -0.53143 |
| H | 5.77266  | 3.29878  | -1.53468 |
| H | 7.24783  | 1.28601  | -0.55416 |
| H | 5.35949  | -2.63874 | 2.91825  |
| H | 2.80635  | -3.26056 | 3.48542  |
| H | -1.68457 | -1.91029 | 0.64922  |
| H | -0.00338 | -2.63183 | -3.1448  |
| H | 1.9937   | -2.50306 | -1.33521 |
| H | -5.37772 | -3.09487 | -2.19198 |
| H | -6.97148 | -1.91259 | -0.3752  |
| H | -1.55249 | 4.20846  | 0.59135  |
| H | 3.08877  | 3.84773  | -1.39051 |
| H | 6.50694  | -1.00435 | 0.94329  |
| H | 0.38362  | -2.55672 | 2.23674  |
| H | -2.73946 | -2.74264 | -2.88669 |

|   |          |         |          |
|---|----------|---------|----------|
| H | -6.50552 | 0.28923 | 1.38303  |
| H | -3.2346  | 0.17764 | 0.06693  |
| H | 3.22067  | 0.15577 | -0.21606 |

### 28TS<sub>3</sub>

|   |             |             |             |
|---|-------------|-------------|-------------|
| N | -2.83069500 | 1.55643400  | 0.82934800  |
| H | -2.58849100 | 0.78403100  | 0.21570400  |
| C | -4.08347100 | 1.60839100  | 1.39337500  |
| C | -4.06763800 | 2.74106700  | 2.29397500  |
| H | -4.91065400 | 3.05473000  | 2.89093700  |
| C | -2.83362500 | 3.31399500  | 2.23979600  |
| H | -2.49582800 | 4.19040100  | 2.77306800  |
| C | -2.02862000 | 2.59443900  | 1.27670300  |
| C | -0.77983200 | 2.92793300  | 0.82088000  |
| N | 1.26404900  | 2.65299300  | -0.50271300 |
| H | 1.87432000  | 3.07636700  | 0.17814700  |
| C | 1.71076000  | 2.09701100  | -1.67441900 |
| C | 0.62013500  | 1.47421800  | -2.26652000 |
| H | 0.63929100  | 0.94941800  | -3.20827400 |
| C | -0.49164900 | 1.64124200  | -1.41601200 |
| H | -1.49661000 | 1.30489400  | -1.61468400 |
| C | -0.08199100 | 2.38426600  | -0.30238000 |
| C | 3.12559300  | 2.22048900  | -2.06642100 |
| N | 3.84376400  | 0.51051400  | -0.52024800 |
| C | 4.10075800  | 1.48715600  | -1.47092400 |
| C | 5.55694300  | 1.67565300  | -1.59276000 |
| H | 6.04529200  | 2.36500700  | -2.26677600 |
| C | 6.12309300  | 0.87263300  | -0.66922200 |
| H | 7.17422000  | 0.75906500  | -0.44227500 |
| C | 5.01976000  | 0.14693800  | -0.00798500 |
| C | 5.14322900  | -0.77398500 | 1.06344600  |
| N | 2.81684300  | -1.47748500 | 0.96878200  |
| H | 2.63681500  | -0.82568000 | 0.20102600  |
| C | 4.04920300  | -1.46036000 | 1.57011300  |
| C | 3.90580400  | -2.19107000 | 2.81157000  |
| H | 4.71346400  | -2.38915500 | 3.50003400  |
| C | 2.59265100  | -2.52351600 | 2.95901000  |
| H | 2.14285800  | -3.06787500 | 3.77622000  |
| C | 1.87799900  | -2.10044200 | 1.77546200  |
| C | 0.56588300  | -2.32718000 | 1.44591300  |
| N | -1.33477600 | -2.14661100 | -0.10217200 |
| H | -2.02546700 | -1.73585100 | 0.51701200  |
| C | -1.64232400 | -2.41191300 | -1.41642900 |
| C | -0.43257100 | -2.76556900 | -2.04701300 |
| H | -0.33501200 | -3.06190800 | -3.08030300 |
| C | 0.59014000  | -2.65928300 | -1.10667500 |

|   |             |             |             |
|---|-------------|-------------|-------------|
| H | 1.63354000  | -2.88881400 | -1.25250200 |
| C | 0.00980100  | -2.29427700 | 0.12919400  |
| C | -2.97044400 | -2.33319600 | -1.92127300 |
| N | -3.77231200 | -0.77191600 | -0.25208000 |
| C | -3.99298800 | -1.64866700 | -1.29917100 |
| C | -5.41963700 | -1.72301700 | -1.57695200 |
| H | -5.88080700 | -2.32884600 | -2.34420200 |
| C | -6.03406700 | -0.92675700 | -0.66302700 |
| H | -7.09265600 | -0.73528600 | -0.55761700 |
| C | -4.97286900 | -0.30113800 | 0.12408100  |
| C | -5.12362700 | 0.75608400  | 1.05937400  |
| H | -0.28563900 | 3.73290200  | 1.35618800  |
| H | 3.40217300  | 2.97168200  | -2.80080000 |
| H | 6.10252600  | -0.89694800 | 1.54858100  |
| H | -0.09380100 | -2.63698200 | 2.25041900  |
| H | -3.18045500 | -2.86528900 | -2.84226900 |
| H | -6.10558700 | 0.96977400  | 1.46167000  |

### [32]heptaphyrin

#### 32F

|   |          |          |          |
|---|----------|----------|----------|
| C | -0.25482 | -2.17261 | -1.85021 |
| C | -0.90368 | -0.97952 | -1.8653  |
| C | 0.06316  | 0.07422  | -1.59519 |
| C | -0.07501 | 1.43864  | -1.53083 |
| C | -1.29972 | 2.15824  | -1.43805 |
| C | -1.53602 | 3.54264  | -1.62608 |
| C | -2.88946 | 3.78208  | -1.40971 |
| C | -3.49506 | 2.55509  | -1.05787 |
| C | -4.82074 | 2.2354   | -0.70662 |
| C | -5.24725 | 0.99425  | -0.25863 |
| N | -4.37933 | -0.04869 | 0.02666  |
| C | -5.14255 | -1.11273 | 0.32697  |
| C | -4.59757 | -2.38222 | 0.70168  |
| C | -3.28367 | -2.57797 | 1.0451   |
| C | -2.57274 | -3.81054 | 1.32279  |
| C | -1.2684  | -3.51008 | 1.5518   |
| C | -1.09945 | -2.06816 | 1.47906  |
| C | 0.06013  | -1.36163 | 1.65452  |
| C | 0.21502  | 0.05953  | 1.66566  |
| N | 1.41072  | 0.6107   | 1.47141  |
| C | 1.24042  | 1.98297  | 1.55993  |
| C | 2.27473  | 2.87929  | 1.39071  |
| C | 3.59998  | 2.51659  | 1.03053  |
| C | 4.77969  | 3.29206  | 0.91965  |

|   |          |          |          |
|---|----------|----------|----------|
| C | 5.81149  | 2.43792  | 0.54174  |
| C | 5.26321  | 1.14076  | 0.38414  |
| C | 5.87082  | -0.07148 | -0.04146 |
| C | 5.18134  | -1.19203 | -0.45357 |
| N | 3.81172  | -1.2175  | -0.6317  |
| C | 3.49127  | -2.45977 | -1.01069 |
| C | 2.16561  | -2.84016 | -1.36361 |
| C | 1.14121  | -1.93166 | -1.54344 |
| N | -2.4966  | 1.60288  | -1.10071 |
| C | -6.61256 | 0.54575  | -0.0997  |
| C | -6.55125 | -0.77576 | 0.23699  |
| N | -2.34784 | -1.56956 | 1.17184  |
| C | -0.80065 | 1.09152  | 1.91373  |
| C | -0.15526 | 2.28368  | 1.85227  |
| N | 3.93737  | 1.23503  | 0.69618  |
| C | 5.73619  | -2.50818 | -0.74994 |
| C | 4.6849   | -3.30685 | -1.06642 |
| N | 1.27813  | -0.57096 | -1.44902 |
| H | -1.84302 | 0.93146  | 2.14347  |
| H | -0.57548 | 3.27016  | 1.98502  |
| H | 4.84563  | 4.35294  | 1.10659  |
| H | 6.84265  | 2.70005  | 0.36098  |
| H | 6.7818   | -2.77577 | -0.69517 |
| H | 4.70348  | -4.35188 | -1.34142 |
| H | -0.68021 | -3.14897 | -2.025   |
| H | -1.94562 | -0.82261 | -2.09266 |
| H | -0.78222 | 4.25883  | -1.91388 |
| H | -3.40493 | 4.72748  | -1.48446 |
| H | -7.49455 | 1.15054  | -0.2551  |
| H | -7.37288 | -1.45089 | 0.42815  |
| H | -3.033   | -4.78717 | 1.32162  |
| H | -0.4644  | -4.19241 | 1.78278  |
| H | -2.69613 | 0.65927  | -0.7841  |
| H | -2.59632 | -0.62    | 0.93143  |
| H | -5.56134 | 3.01881  | -0.82261 |
| H | -5.25922 | -3.2391  | 0.72068  |
| H | 1.94949  | -3.88757 | -1.53077 |
| H | 0.82855  | 2.03505  | -1.48506 |
| H | 6.95449  | -0.10287 | -0.04376 |
| H | 2.07331  | 3.93526  | 1.52991  |
| H | 0.97553  | -1.93464 | 1.73714  |
| H | 2.14359  | -0.17787 | -1.08923 |
| H | 3.27196  | 0.46286  | 0.76301  |

### 32M<sub>A</sub>

|   |          |          |          |
|---|----------|----------|----------|
| C | -0.33038 | -1.98331 | -0.44338 |
| C | 0.55801  | -1.93685 | -1.56338 |
| H | 1.6215   | -2.11006 | -1.52388 |
| C | -0.19616 | -1.72425 | -2.69919 |

|   |          |          |          |
|---|----------|----------|----------|
| H | 0.16243  | -1.66598 | -3.71542 |
| C | -1.5608  | -1.60023 | -2.3108  |
| C | -2.72286 | -1.4214  | -3.07224 |
| C | -3.98734 | -1.21516 | -2.52042 |
| C | -5.25999 | -1.34233 | -3.20833 |
| H | -5.38643 | -1.56813 | -4.2575  |
| C | -6.22656 | -1.16527 | -2.26707 |
| H | -7.29849 | -1.19188 | -2.40125 |
| C | -5.53755 | -0.8507  | -1.02407 |
| C | -6.15562 | -0.38486 | 0.15089  |
| C | -5.5144  | 0.343    | 1.14655  |
| C | -6.10131 | 1.02827  | 2.26278  |
| H | -7.13126 | 0.92226  | 2.5679   |
| C | -5.14908 | 1.8431   | 2.81032  |
| H | -5.26076 | 2.51562  | 3.64728  |
| C | -3.92524 | 1.67632  | 2.07599  |
| C | -2.76382 | 2.41908  | 2.21602  |
| C | -1.54283 | 2.23953  | 1.53334  |
| C | -1.06059 | 1.01218  | 0.898    |
| H | -1.56175 | 0.06153  | 0.89891  |
| C | 0.14909  | 1.30819  | 0.36326  |
| H | 0.78067  | 0.65497  | -0.2185  |
| C | 0.37354  | 2.72369  | 0.64828  |
| C | 1.35081  | 3.55979  | 0.11749  |
| C | 2.49036  | 3.23317  | -0.6249  |
| C | 3.19875  | 4.11617  | -1.48986 |
| H | 2.91815  | 5.14394  | -1.66244 |
| C | 4.22975  | 3.418    | -2.0724  |
| H | 4.95335  | 3.7834   | -2.7849  |
| C | 4.22969  | 2.10025  | -1.53108 |
| C | 5.2496   | 1.15253  | -1.64754 |
| C | 5.42752  | 0.00565  | -0.87549 |
| C | 6.72431  | -0.63823 | -0.71959 |
| H | 7.61002  | -0.40653 | -1.29373 |
| C | 6.59941  | -1.49741 | 0.32299  |
| H | 7.35543  | -2.13247 | 0.76204  |
| C | 5.20827  | -1.43383 | 0.74057  |
| C | 4.66212  | -2.21337 | 1.77119  |
| C | 3.30734  | -2.41212 | 1.9933   |
| C | 2.65414  | -3.10336 | 3.06249  |
| H | 3.16692  | -3.55979 | 3.89519  |
| C | 1.30433  | -3.06718 | 2.8307   |
| H | 0.52139  | -3.50585 | 3.43036  |
| C | 1.07837  | -2.40219 | 1.58065  |
| C | -0.12919 | -2.29243 | 0.90859  |
| N | -1.58701 | -1.75948 | -0.94736 |
| H | -2.46588 | -1.6576  | -0.44355 |
| N | -4.19434 | -0.91432 | -1.19721 |
| N | -4.18562 | 0.70877  | 1.12001  |
| H | -3.61997 | 0.4844   | 0.30732  |

|   |          |          |          |
|---|----------|----------|----------|
| N | -0.65433 | 3.23831  | 1.38902  |
| N | 3.1344   | 2.0114   | -0.69962 |
| H | 3.03104  | 1.23101  | -0.06123 |
| N | 4.51501  | -0.52864 | -0.00789 |
| N | 2.31509  | -1.99757 | 1.13129  |
| H | 2.53296  | -1.38816 | 0.35181  |
| H | 6.06668  | 1.43056  | -2.30342 |
| H | 5.34825  | -2.73297 | 2.42911  |
| H | -2.82666 | 3.29063  | 2.85798  |
| H | 1.16505  | 4.62132  | 0.2421   |
| H | -7.23143 | -0.48076 | 0.23364  |
| H | -2.63043 | -1.48942 | -4.14937 |
| H | -1.01332 | -2.52613 | 1.49199  |

### 32M<sub>B</sub>

|   |          |          |          |
|---|----------|----------|----------|
| C | -0.36649 | -1.9632  | -0.28045 |
| C | 0.52811  | -1.96023 | -1.402   |
| H | 1.59507  | -2.0675  | -1.30262 |
| C | -0.22347 | -1.83419 | -2.54438 |
| H | 0.13456  | -1.81891 | -3.56262 |
| C | -1.59996 | -1.71993 | -2.16877 |
| C | -2.75226 | -1.62542 | -2.94811 |
| C | -4.03351 | -1.41407 | -2.42145 |
| C | -5.29627 | -1.63785 | -3.09891 |
| H | -5.41107 | -1.96104 | -4.12366 |
| C | -6.2746  | -1.40265 | -2.17942 |
| H | -7.34454 | -1.47058 | -2.31534 |
| C | -5.6022  | -0.96107 | -0.97029 |
| C | -6.2257  | -0.39846 | 0.15566  |
| C | -5.59175 | 0.42292  | 1.08206  |
| C | -6.17763 | 1.20723  | 2.1245   |
| H | -7.20689 | 1.1297   | 2.44025  |
| C | -5.22451 | 2.0751   | 2.5932   |
| H | -5.33847 | 2.82159  | 3.3646   |
| C | -4.00723 | 1.84391  | 1.87295  |
| C | -2.83869 | 2.59927  | 1.94693  |
| C | -1.62047 | 2.33766  | 1.3097   |
| C | -1.07103 | 1.12179  | 0.80233  |
| H | -1.5563  | 0.16654  | 0.86865  |
| C | 0.18759  | 1.37317  | 0.30681  |
| H | 0.88324  | 0.67222  | -0.12376 |
| C | 0.44728  | 2.76676  | 0.44618  |
| C | 1.4644   | 3.57159  | -0.05774 |
| C | 2.65172  | 3.19472  | -0.6971  |
| C | 3.45898  | 4.16192  | -1.43724 |
| H | 3.22881  | 5.21167  | -1.55394 |
| C | 4.50401  | 3.46935  | -1.94796 |
| H | 5.32035  | 3.83453  | -2.55483 |
| C | 4.35805  | 2.10256  | -1.45475 |

|   |          |          |          |
|---|----------|----------|----------|
| C | 5.3855   | 1.1597   | -1.57473 |
| C | 5.5428   | -0.02841 | -0.86791 |
| C | 6.76472  | -0.76449 | -0.72716 |
| H | 7.6687   | -0.54891 | -1.27621 |
| C | 6.58153  | -1.7068  | 0.24917  |
| H | 7.30314  | -2.41364 | 0.62953  |
| C | 5.22405  | -1.62448 | 0.69663  |
| C | 4.62045  | -2.3853  | 1.6945   |
| C | 3.25036  | -2.45686 | 1.96133  |
| C | 2.65427  | -3.09195 | 3.13314  |
| H | 3.19836  | -3.55221 | 3.94567  |
| C | 1.31245  | -2.95699 | 2.98987  |
| H | 0.53031  | -3.30421 | 3.65013  |
| C | 1.1078   | -2.30734 | 1.69627  |
| C | -0.13948 | -2.18961 | 1.0775   |
| N | -1.62843 | -1.79268 | -0.79657 |
| H | -2.51116 | -1.70854 | -0.29996 |
| N | -4.25321 | -1.00407 | -1.13549 |
| N | -4.26115 | 0.79598  | 1.01492  |
| H | -3.69449 | 0.48301  | 0.23066  |
| N | -0.6578  | 3.2986   | 1.09787  |
| N | 3.21541  | 1.95773  | -0.73251 |
| N | 4.63103  | -0.61332 | -0.02473 |
| N | 2.29307  | -1.97711 | 1.12691  |
| H | 6.23675  | 1.45026  | -2.18032 |
| H | 5.28501  | -2.98542 | 2.30556  |
| H | -2.91754 | 3.52023  | 2.51562  |
| H | 1.30056  | 4.64441  | 0.0088   |
| H | -7.30025 | -0.50018 | 0.25006  |
| H | -2.64595 | -1.76137 | -4.01756 |
| H | -1.01377 | -2.36487 | 1.69776  |
| H | 3.68101  | -0.28372 | 0.11285  |
| H | -0.7907  | 4.2809   | 1.27579  |

### 32H

|   |          |          |          |
|---|----------|----------|----------|
| C | -5.98204 | -1.1585  | 1.05164  |
| C | -6.61772 | -2.44756 | 1.22329  |
| H | -7.62663 | -2.57999 | 1.58358  |
| C | -5.75086 | -3.40509 | 0.80912  |
| H | -5.90963 | -4.47287 | 0.78294  |
| C | -4.51136 | -2.76681 | 0.4141   |
| C | -3.40061 | -3.398   | -0.06942 |
| C | -2.09754 | -2.85018 | -0.26884 |
| C | -1.40586 | -1.79869 | 0.36543  |
| H | -1.83732 | -1.14513 | 1.10523  |
| C | -0.06785 | -1.8493  | -0.03735 |
| H | 0.75302  | -1.23348 | 0.28909  |
| C | 0.07138  | -2.91035 | -0.94538 |
| C | 1.17646  | -3.49991 | -1.60629 |



|   |          |          |          |
|---|----------|----------|----------|
| C | 2.51999  | -3.34892 | -1.36865 |
| C | 3.49558  | -4.30678 | -1.87899 |
| H | 3.29811  | -5.06716 | -2.62152 |
| C | 4.63294  | -4.09025 | -1.17937 |
| H | 5.57152  | -4.62257 | -1.23961 |
| C | 4.35502  | -2.95244 | -0.30104 |
| C | 5.4681   | -1.22197 | 1.17554  |
| C | 6.55449  | -0.84702 | 2.0629   |
| H | 7.27143  | -1.55216 | 2.45575  |
| C | 6.50907  | 0.48797  | 2.25712  |
| H | 7.18325  | 1.09917  | 2.83795  |
| C | 5.40235  | 1.0272   | 1.48645  |
| C | 5.22016  | 2.36216  | 1.25269  |
| C | 4.30573  | 3.00986  | 0.36919  |
| C | 4.62608  | 4.31051  | -0.22678 |
| H | 5.52529  | 4.88075  | -0.04204 |
| C | 3.59759  | 4.60471  | -1.05222 |
| H | 3.4617   | 5.48072  | -1.67079 |
| C | 2.62284  | 3.52955  | -0.88176 |
| C | 1.33386  | 3.66622  | -1.33228 |
| C | 0.16226  | 2.9632   | -0.95722 |
| C | -0.08414 | 1.85052  | -0.12857 |
| H | 0.69794  | 1.26033  | 0.31866  |
| C | -1.46387 | 1.7239   | 0.02226  |
| H | -2.00875 | 1.01549  | 0.61935  |
| C | -2.0856  | 2.76433  | -0.70027 |
| C | -3.42099 | 3.23559  | -0.75755 |
| C | -4.56271 | 2.66056  | -0.25576 |
| C | -5.83942 | 3.36482  | -0.1763  |
| H | -6.01779 | 4.37431  | -0.51908 |
| C | -6.70451 | 2.52028  | 0.43099  |
| H | -7.74454 | 2.68457  | 0.67414  |
| C | -5.96245 | 1.28134  | 0.66764  |
| C | -6.56708 | 0.08268  | 1.13069  |
| N | -4.6928  | -1.40897 | 0.63013  |
| H | -4.12288 | -0.64159 | 0.27841  |
| N | -1.18452 | -3.48097 | -1.07302 |
| N | 3.10982  | -2.50087 | -0.44039 |
| N | 4.75298  | -0.05982 | 0.9279   |
| N | 3.12311  | 2.54835  | -0.03629 |
| N | -1.07165 | 3.47244  | -1.3032  |
| H | -1.20909 | 4.30242  | -1.85741 |
| N | -4.68525 | 1.3886   | 0.27243  |
| C | 5.33345  | -2.46096 | 0.61809  |
| H | -7.60172 | 0.12525  | 1.44665  |
| H | -3.51966 | -4.45477 | -0.28737 |
| H | 0.92378  | -4.2801  | -2.32109 |
| H | 6.12554  | -3.15868 | 0.86774  |
| H | 5.95908  | 3.00838  | 1.71345  |
| H | 1.16492  | 4.52983  | -1.97171 |

|   |          |          |          |
|---|----------|----------|----------|
| H | -3.55316 | 4.21493  | -1.21129 |
| H | 3.96871  | 0.00869  | 0.29276  |
| H | -1.39149 | -4.28374 | -1.64511 |

### 32TS<sub>1</sub>

|   |          |          |          |
|---|----------|----------|----------|
| C | -0.01234 | 0.30498  | -1.77508 |
| C | -0.9367  | -0.75679 | -1.95667 |
| H | -2.00697 | -0.65781 | -2.03672 |
| C | -0.21305 | -1.93321 | -2.09496 |
| H | -0.60933 | -2.92136 | -2.27059 |
| C | 1.16023  | -1.61848 | -1.97859 |
| C | 2.30383  | -2.43693 | -2.11925 |
| C | 3.59945  | -2.01708 | -1.897   |
| C | 4.81624  | -2.70917 | -2.28661 |
| H | 4.86117  | -3.67582 | -2.76771 |
| C | 5.84769  | -1.8856  | -1.96366 |
| H | 6.90537  | -2.05592 | -2.10524 |
| C | 5.25712  | -0.72259 | -1.30764 |
| C | 5.98894  | 0.28422  | -0.62217 |
| C | 5.45826  | 1.06059  | 0.38418  |
| C | 6.17513  | 1.92178  | 1.30974  |
| H | 7.21605  | 2.18739  | 1.2001   |
| C | 5.33608  | 2.26458  | 2.31518  |
| H | 5.55718  | 2.86833  | 3.18258  |
| C | 4.03563  | 1.66069  | 2.06067  |
| C | 2.94929  | 1.61901  | 2.86462  |
| C | 1.68597  | 0.97432  | 2.46981  |
| C | 0.65983  | 1.60192  | 1.64001  |
| H | 0.70607  | 2.59356  | 1.21466  |
| C | -0.34049 | 0.68926  | 1.51886  |
| H | -1.25945 | 0.81745  | 0.97126  |
| C | 0.1041   | -0.49154 | 2.23798  |
| C | -0.43162 | -1.7498  | 2.33364  |
| C | -1.64496 | -2.29517 | 1.8503   |
| C | -2.03185 | -3.64859 | 1.96869  |
| H | -1.41603 | -4.41866 | 2.40724  |
| C | -3.30696 | -3.78557 | 1.43962  |
| H | -3.9029  | -4.68315 | 1.38169  |
| C | -3.7239  | -2.5131  | 0.99136  |
| C | -4.99631 | -2.1357  | 0.49818  |
| C | -5.38264 | -0.878   | 0.08894  |
| C | -6.76529 | -0.45625 | -0.10065 |
| H | -7.63005 | -1.09951 | -0.02193 |
| C | -6.73217 | 0.87917  | -0.32741 |
| H | -7.56306 | 1.5495   | -0.49443 |
| C | -5.3227  | 1.26088  | -0.34913 |
| C | -4.84518 | 2.55403  | -0.65972 |
| C | -3.52567 | 2.82245  | -0.97737 |
| C | -2.87425 | 4.07503  | -1.26966 |

|   |          |          |          |
|---|----------|----------|----------|
| H | -3.36898 | 5.03412  | -1.26228 |
| C | -1.56019 | 3.81868  | -1.53201 |
| H | -0.79126 | 4.5303   | -1.79283 |
| C | -1.34294 | 2.39473  | -1.45174 |
| C | -0.17873 | 1.70813  | -1.6926  |
| N | 1.23528  | -0.26194 | -1.78083 |
| H | 2.1335   | 0.18297  | -1.60548 |
| N | 3.91728  | -0.80712 | -1.30292 |
| N | 4.15526  | 1.02268  | 0.82403  |
| H | 3.5182   | 0.32121  | 0.45856  |
| N | 1.35585  | -0.24658 | 2.82515  |
| N | -2.689   | -1.64225 | 1.23226  |
| H | -2.78843 | -0.65248 | 1.04888  |
| N | -4.53236 | 0.19462  | -0.09191 |
| N | -2.56294 | 1.84977  | -1.09959 |
| H | -2.7959  | 0.88662  | -0.87833 |
| H | -5.75526 | -2.90922 | 0.5237   |
| H | -5.55296 | 3.37197  | -0.69564 |
| H | 3.03022  | 2.04751  | 3.8578   |
| H | 0.18942  | -2.45768 | 2.8732   |
| H | 7.0568   | 0.34696  | -0.78923 |
| H | 2.14081  | -3.4485  | -2.47244 |
| H | 0.7112   | 2.3127   | -1.8294  |

### 32TS<sub>2</sub>

|   |             |             |             |
|---|-------------|-------------|-------------|
| N | 0.00000000  | 0.00000000  | 0.00000000  |
| C | 0.00000000  | 0.00000000  | 1.37861638  |
| C | 1.23624540  | 0.00000000  | 2.07231401  |
| C | 1.52792952  | -0.27825762 | 3.38684804  |
| C | 2.90027412  | -0.35466804 | 3.87972805  |
| C | 2.82327077  | -0.77948632 | 5.16158649  |
| C | 1.39875744  | -0.94410384 | 5.44767221  |
| C | 0.89406085  | -1.40409589 | 6.69860905  |
| C | -0.43375274 | -1.49691500 | 7.02127182  |
| N | -1.48525585 | -1.15042192 | 6.20188576  |
| C | -2.69226828 | -1.24370637 | 6.87890875  |
| C | -3.92640370 | -0.86701169 | 6.46209552  |
| C | -4.28172122 | -0.28921061 | 5.16609397  |
| C | -4.38709172 | -0.83693757 | 3.88347545  |
| C | -4.95866113 | 0.13175355  | 3.03981986  |
| C | -5.18336302 | 1.28577153  | 3.79878632  |
| C | -5.73534960 | 2.56130023  | 3.51863386  |
| C | -6.41070491 | 3.00732198  | 2.40926631  |
| C | -7.12892061 | 4.27727140  | 2.39936329  |
| C | -7.89661745 | 4.26498566  | 1.28618768  |
| C | -7.59930305 | 3.00346562  | 0.60572429  |
| C | -8.30744770 | 2.59590641  | -0.56500380 |
| C | -8.04087319 | 1.61065617  | -1.47732076 |
| N | -6.89709003 | 0.84576636  | -1.65497759 |

|   |             |             |             |
|---|-------------|-------------|-------------|
| C | -7.01907350 | 0.05226812  | -2.77826424 |
| C | -6.07046498 | -0.67883204 | -3.45112274 |
| C | -4.66030688 | -0.74633066 | -3.28485191 |
| C | -3.81443410 | -1.20605764 | -4.39184319 |
| C | -2.54120520 | -1.00265497 | -3.99513292 |
| C | -2.61724913 | -0.49318523 | -2.62680155 |
| C | -1.47337515 | -0.30774350 | -1.88506461 |
| C | -1.27985340 | -0.09082466 | -0.49998675 |
| C | -2.13991687 | -0.08711246 | 0.61898678  |
| C | -1.35611597 | -0.04236129 | 1.76784222  |
| N | 0.64106448  | -0.62758763 | 4.39002650  |
| C | -2.35885827 | -1.76269757 | 8.20360962  |
| C | -1.01870205 | -1.90777991 | 8.28682815  |
| N | -4.75973206 | 0.98878371  | 5.08688849  |
| N | -6.69443135 | 2.27937546  | 1.26422496  |
| C | -8.36499457 | 0.25663839  | -3.27645356 |
| C | -8.95860033 | 1.21067900  | -2.52473701 |
| N | -3.93687541 | -0.33851433 | -2.23699427 |
| H | 3.63021849  | -0.97278655 | 5.85391622  |
| H | 3.78503876  | -0.12909071 | 3.30121433  |
| H | -1.70045943 | -0.03438258 | 2.78737085  |
| H | -3.21323179 | -0.13677991 | 0.55074679  |
| H | -1.62773256 | -1.20394738 | -4.53687452 |
| H | -4.17175733 | -1.59094472 | -5.33640726 |
| H | -8.76617596 | -0.25505304 | -4.13818195 |
| H | -9.94807402 | 1.62671370  | -2.64038489 |
| H | -8.59441316 | 5.01586087  | 0.94348233  |
| H | -7.07335994 | 5.03555621  | 3.16776841  |
| H | -5.22038378 | 0.03866084  | 1.99905208  |
| H | -4.11630298 | -1.84773663 | 3.62137197  |
| H | -3.09503435 | -1.96502504 | 8.96710824  |
| H | -0.44281001 | -2.25144618 | 9.13310396  |
| H | -4.78635017 | 1.62867528  | 5.86492549  |
| H | 1.61178749  | -1.68415878 | 7.45942043  |
| H | 2.10706735  | 0.18400045  | 1.44687717  |
| H | -0.55306455 | -0.42788717 | -2.45258299 |
| H | -6.44580966 | -1.16973308 | -4.34213175 |
| H | -9.22633126 | 3.14041471  | -0.75516120 |
| H | -5.68434691 | 3.27436640  | 4.33859990  |
| H | -4.72871639 | -0.96855342 | 7.18784166  |
| H | 0.83268656  | -0.04566457 | -0.56555576 |
| H | -1.30892800 | -0.80608580 | 5.26269075  |
| H | -6.04712312 | 0.94006208  | -1.11523046 |
